# Supplementary material
Source: PubMed Central journal article supplement (PMC6199664)
Supplement: ba021469-suppl1.pdf [file ba021469-suppl1.pdf]

**Supplementary Table 1: TruSight Myeloid (Illumina) NGS Gene Panel. (A) Genes in the TruSight Myeloid (Illumina) NGS Gene Panel (B) Exon coverage for hotspot genes (A)**

| <b>Complete coding region coverage (15/54)</b> | <b>Hotspot coverage (39/54)</b> |
|------------------------------------------------|---------------------------------|
| <i>BCOR</i>                                    | <i>ABL1</i>                     |
| <i>BCORL1</i>                                  | <i>ASXL1</i>                    |
| <i>CDKN2A</i>                                  | <i>ATRX</i>                     |
| <i>CEBPA</i>                                   | <i>BRAF</i>                     |
| <i>CUX1</i>                                    | <i>CALR</i>                     |
| <i>DNMT3A</i>                                  | <i>CBL</i>                      |
| <i>ETV6/TEL</i>                                | <i>CBLB</i>                     |
| <i>EZH2</i>                                    | <i>CBLC</i>                     |
| <i>IKZF1</i>                                   | <i>CSF3R</i>                    |
| <i>KDM6A</i>                                   | <i>FBXW7</i>                    |
| <i>PHF6</i>                                    | <i>FLT3</i>                     |
| <i>RAD21</i>                                   | <i>GATA1</i>                    |
| <i>RUNX1</i>                                   | <i>GATA2</i>                    |
| <i>STAG2</i>                                   | <i>GNAS</i>                     |
| <i>ZRSR2</i>                                   | <i>HRAS</i>                     |
|                                                | <i>IDH1</i>                     |
|                                                | <i>IDH2</i>                     |
|                                                | <i>JAK2</i>                     |
|                                                | <i>JAK3</i>                     |
|                                                | <i>KIT</i>                      |
|                                                | <i>KMT2A</i>                    |
|                                                | <i>KRAS</i>                     |
|                                                | <i>MPL</i>                      |
|                                                | <i>MYD88</i>                    |
|                                                | <i>NOTCH1</i>                   |
|                                                | <i>NPM1</i>                     |
|                                                | <i>NRAS</i>                     |
|                                                | <i>PDGFRA</i>                   |
|                                                | <i>PTEN</i>                     |
|                                                | <i>PTPN11</i>                   |
|                                                | <i>SETBP1</i>                   |
|                                                | <i>SF3B1</i>                    |
|                                                | <i>SMC1A</i>                    |
|                                                | <i>SMC3</i>                     |
|                                                | <i>SRSF2</i>                    |
|                                                | <i>TET2</i>                     |
|                                                | <i>TP53</i>                     |
|                                                | <i>U2AF1</i>                    |
|                                                | <i>WT1</i>                      |

(B)

| <b>Hotspot coverage<br/>(39/54)</b> | <b>Exon Coverage</b>   |
|-------------------------------------|------------------------|
| <i>ABL1</i>                         | 4-6                    |
| <i>ASXL1</i>                        | 12                     |
| <i>ATRX</i>                         | 8-10 and 17-31         |
| <i>BRAF</i>                         | 15                     |
| <i>CALR</i>                         | 9                      |
| <i>CBL</i>                          | 8, 9                   |
| <i>CBLB</i>                         | 9, 10                  |
| <i>CBLC</i>                         | 9, 10                  |
| <i>CSF3R</i>                        | 14-17                  |
| <i>FBXW7</i>                        | 9-11                   |
| <i>FLT3</i>                         | 14, 15, 20             |
| <i>GATA1</i>                        | 2                      |
| <i>GATA2</i>                        | 2-6                    |
| <i>GNAS</i>                         | 8, 9                   |
| <i>HRAS</i>                         | 2, 3                   |
| <i>IDH1</i>                         | 4                      |
| <i>IDH2</i>                         | 4                      |
| <i>JAK2</i>                         | 12, 14                 |
| <i>JAK3</i>                         | 13                     |
| <i>KIT</i>                          | 2, 8-11, 13, 17        |
| <i>KMT2A</i>                        | 2, 3                   |
| <i>KRAS</i>                         | 5-8                    |
| <i>MPL</i>                          | 10                     |
| <i>MYD88</i>                        | 3-5                    |
| <i>NOTCH1</i>                       | 26-28, 34              |
| <i>NPM1</i>                         | 12                     |
| <i>NRAS</i>                         | 2, 3                   |
| <i>PDGFRA</i>                       | 12, 14, 18             |
| <i>PTEN</i>                         | 5, 7                   |
| <i>PTPN11</i>                       | 3, 13                  |
| <i>SETBP1</i>                       | 4 (partial)            |
| <i>SF3B1</i>                        | 13-16                  |
| <i>SMC1A</i>                        | 2, 11, 16, 17          |
| <i>SMC3</i>                         | 10, 13, 19, 23, 25, 28 |
| <i>SRSF2</i>                        | 1                      |
| <i>TET2</i>                         | 3-11                   |
| <i>TP53</i>                         | 2-11                   |
| <i>U2AF1</i>                        | 2, 6                   |
| <i>WT1</i>                          | 7, 9                   |

**Supplementary Table 2: Annotation of variants**

| UPN    | Gene  | Transcript ID | cDNA                     | Protein           | Change     | VAF (%) | Read Depth | Classification |
|--------|-------|---------------|--------------------------|-------------------|------------|---------|------------|----------------|
| PT-001 | ASXL1 | NM_015338.5   | c.1773C>G                | p.Tyr591*         | Nonsense   | 47.7    | 8217       | Oncogenic      |
| PT-005 | ASXL1 | NM_015338.5   | c.1772dupA               | p.Tyr591*         | Nonsense   | 47.1    | 4985       | Oncogenic      |
| PT-010 | ASXL1 | NM_015338.5   | c.1934dupG               | p.Gly646Trpfs*12  | Frameshift | 28.7    | 6084       | Oncogenic      |
| PT-011 | ASXL1 | NM_015338.5   | c.4159_4162dupGCTA       | p.Thr1388Serfs*5  | Frameshift | 45.0    | 3720       | Oncogenic      |
| PT-013 | ASXL1 | NM_015338.5   | c.2074C>T                | p.Gln692*         | Nonsense   | 39.1    | 4212       | Oncogenic      |
| PT-018 | ASXL1 | NM_015338.5   | c.3000_3001insG          | p.Thr1001Aspfs*4  | Frameshift | 41.5    | 6409       | Oncogenic      |
| PT-020 | ASXL1 | NM_015338.5   | c.2582delC               | p.Ala861Aspfs*6   | Frameshift | 39.3    | 7053       | Oncogenic      |
| PT-021 | ASXL1 | NM_015338.5   | c.1934dupG               | p.Gly646Trpfs*12  | Frameshift | 31.4    | 2021       | Oncogenic      |
| PT-024 | ASXL1 | NM_015338.5   | c.1879dupG               | p.Ala627Glyfs*8   | Frameshift | 48.6    | 1983       | Oncogenic      |
| PT-027 | ASXL1 | NM_015338.5   | c.1934dupG               | p.Gly646Trpfs*12  | Frameshift | 35.3    | 4996       | Oncogenic      |
| PT-030 | ASXL1 | NM_015338.5   | c.2464dupA               | p.Thr822Asnfs*11  | Frameshift | 26.6    | 8797       | Oncogenic      |
| PT-031 | ASXL1 | NM_015338.5   | c.2407C>T                | p.Gln803*         | Nonsense   | 46.9    | 10503      | Oncogenic      |
| PT-033 | ASXL1 | NM_015338.5   | c.1934dupG               | p.Gly646Trpfs*12  | Frameshift | 29.3    | 5278       | Oncogenic      |
| PT-034 | ASXL1 | NM_015338.5   | c.1934dupG               | p.Gly646Trpfs*12  | Frameshift | 35.9    | 7301       | Oncogenic      |
| PT-036 | ASXL1 | NM_015338.5   | c.3935C>T                | p.Ala1312Val      | Missense   | 43.4    | 10396      | VUS            |
| PT-037 | ASXL1 | NM_015338.5   | c.1934dupG               | p.Gly646Trpfs*12  | Frameshift | 34.0    | 6033       | Oncogenic      |
| PT-042 | ASXL1 | NM_015338.5   | c.2957A>G                | p.Asn986Ser       | Missense   | 49.0    | 6285       | VUS            |
| PT-049 | ASXL1 | NM_015338.5   | c.1934dupG               | p.Gly646Trpfs*12  | Frameshift | 34.1    | 4808       | Oncogenic      |
| PT-050 | ASXL1 | NM_015338.5   | c.3509_3510insG          | p.Arg1171Lysfs*11 | Frameshift | 42.7    | 5805       | Oncogenic      |
| PT-051 | ASXL1 | NM_015338.5   | c.2143dupA               | p.Arg715Lysfs*3   | Frameshift | 47.8    | 5149       | Oncogenic      |
| PT-053 | ASXL1 | NM_015338.5   | c.2898_2900delAGG        | p.Gly967del       | Missense   | 45.2    | 7814       | VUS            |
| PT-055 | ASXL1 | NM_015338.5   | c.1777A>G                | p.Ile593Val       | Missense   | 47.8    | 5732       | VUS            |
| PT-055 | ASXL1 | NM_015338.5   | c.2957A>G                | p.Asn986Ser       | Missense   | 49.2    | 6691       | VUS            |
| PT-057 | ASXL1 | NM_015338.5   | c.2560delA               | p.Thr854Leufs*13  | Frameshift | 36.6    | 6716       | Oncogenic      |
| PT-060 | ASXL1 | NM_015338.5   | c.2046_2055dupCACCCCTGGA | p.Lys686Hisfs*35  | Frameshift | 20.9    | 4795       | Oncogenic      |
| PT-064 | ASXL1 | NM_015338.5   | c.1771dupT               | p.Tyr591Leufs*28  | Frameshift | 41.5    | 9024       | Oncogenic      |
| PT-065 | ASXL1 | NM_015338.5   | c.2324T>G                | p.Leu775*         | Nonsense   | 47.2    | 6846       | Oncogenic      |
| PT-068 | ASXL1 | NM_015338.5   | c.2738_2739insTGAATCC    | p.Glu917Ilefs*9   | Frameshift | 12.5    | 7913       | Oncogenic      |
| PT-083 | ASXL1 | NM_015338.5   | c.3052_3053delAC         | p.Thr1018*        | Nonsense   | 47.0    | 6010       | Oncogenic      |
| PT-098 | ASXL1 | NM_015338.5   | c.2077C>T                | p.Arg693*         | Nonsense   | 35.03   | 1681       | Oncogenic      |

|        |        |                |                                        |                   |            |      |       |           |
|--------|--------|----------------|----------------------------------------|-------------------|------------|------|-------|-----------|
| PT-100 | ASXL1  | NM_015338.5    | c.2564_2567delATTG                     | p.Asp855Alafs*11  | Frameshift | 49.7 | 12997 | Oncogenic |
| PT-108 | ASXL1  | NM_015338.5    | c.2385dupC                             | p.Trp796Leufs*4   | Frameshift | 35.7 | 3914  | Oncogenic |
| PT-171 | ASXL1  | NM_015338.5    | c.2494G>A                              | p.Asp832Asn       | Missense   | 49.0 | 5098  | VUS       |
| PT-173 | ASXL1  | NM_015338.5    | c.3445A>G                              | p.Met1149Val      | Missense   | 49.6 | 2151  | VUS       |
| PT-176 | ASXL1  | NM_015338.5    | c.2530dupA                             | p.Thr844Asnfs*7   | Frameshift | 31.1 | 10832 | Oncogenic |
| PT-177 | ASXL1  | NM_015338.5    | c.3671G>C                              | p.Arg1224Thr      | Missense   | 51.4 | 10120 | VUS       |
| PT-182 | ASXL1  | NM_015338.5    | c.2077C>T                              | p.Arg693*         | Nonsense   | 36.5 | 1548  | Oncogenic |
| PT-184 | ASXL1  | NM_015338.5    | c.2740G>T                              | p.Glu914*         | Nonsense   | 43.7 | 3668  | Oncogenic |
| PT-188 | ASXL1  | NM_015338.5    | c.1900_1922delAGAGAGGGCCGCCACCACTGCCAT | p.Glu635Argfs*15  | Frameshift | 43.2 | 350   | Oncogenic |
| PT-191 | ASXL1  | NM_015338.5    | c.1934dupG                             | p.Gly646Trpfs*12  | Frameshift | 31.0 | 7672  | Oncogenic |
| PT-192 | ASXL1  | NM_015338.5    | c.2812_2816delinsTGA                   | p.Pro938*         | Nonsense   | 21.4 | 1935  | Oncogenic |
| PT-193 | ASXL1  | NM_015338.5    | c.2077C>T                              | p.Arg693*         | Nonsense   | 32.7 | 1077  | Oncogenic |
| PT-193 | ASXL1  | NM_015338.5    | c.3935C>T                              | p.Ala1312Val      | Missense   | 44.6 | 2985  | VUS       |
| PT-199 | ASXL1  | NM_015338.5    | c.1934dupG                             | p.Gly646Trpfs*12  | Frameshift | 32.6 | 1341  | Oncogenic |
| PT-200 | ASXL1  | NM_015338.5    | c.1934dupG                             | p.Gly646Trpfs*12  | Frameshift | 40.2 | 2020  | Oncogenic |
| PT-204 | ASXL1  | NM_015338.5    | c.2957A>G                              | p.Asn986Ser       | Missense   | 49.1 | 2741  | VUS       |
| PT-021 | ATRX   | NM_000489.4    | c.5579A>G                              | p.Asn1860Ser      | Missense   | 99.6 | 2809  | VUS       |
| PT-183 | ATRX   | NM_000489.4    | c.5579A>G                              | p.Asn1860Ser      | Missense   | 50.5 | 1920  | VUS       |
| PT-031 | BCOR   | NM_001123385.1 | c.3226G>A                              | p.Glu1076Lys      | Missense   | 51.8 | 2371  | VUS       |
| PT-037 | BCOR   | NM_001123385.1 | c.1005delC                             | p.Ser336Argfs*42  | Frameshift | 77.5 | 6841  | Oncogenic |
| PT-043 | BCOR   | NM_001123385.1 | c.1865delC                             | p.Pro622Glnfs*47  | Frameshift | 41.1 | 8298  | Oncogenic |
| PT-097 | BCOR   | NM_001123385.1 | c.4319C>T                              | p.Pro1440Leu      | Missense   | 99.9 | 1212  | VUS       |
| PT-047 | BCORL1 | NM_021946.4    | c.4880dupA                             | p.Asp1627Glufs*21 | Frameshift | 56.0 | 3862  | Oncogenic |
| PT-068 | BCORL1 | NM_021946.4    | c.3332C>T                              | p.Thr1111Met      | Missense   | 61.6 | 4470  | VUS       |
| PT-090 | BCORL1 | NM_021946.4    | c.3332C>T                              | p.Thr1111Met      | Missense   | 47.5 | 3253  | VUS       |
| PT-103 | BCORL1 | NM_021946.4    | c.3158A>G                              | p.Lys1053Arg      | Missense   | 48.5 | 1999  | VUS       |
| PT-003 | CALR   | NM_004343.3    | c.1154_1155insTTGTC                    | p.Lys385Asnfs*47  | Frameshift | 47.1 | 184   | Oncogenic |
| PT-005 | CALR   | NM_004343.3    | c.1154_1155insTTGTC                    | p.Lys385Asnfs*47  | Frameshift | 47.1 | 1414  | Oncogenic |
| PT-008 | CALR   | NM_004343.3    | c.1120_1139delinsG                     | p.Lys374fs        | Frameshift | 41   | 1277  | Oncogenic |
| PT-033 | CALR   | NM_004343.3    | c.1103_1154del                         | p.Lys368Argfs*45  | Frameshift | 48.7 | 2045  | Oncogenic |
| PT-036 | CALR   | NM_004343.3    | c.1099_1150del                         | p.Leu367Thrfs*46  | Frameshift | 59.0 | 2103  | Oncogenic |
| PT-052 | CALR   | NM_004343.3    | c.1094_1139del                         | p.Gln365Argfs*50  | Frameshift | 63.5 | 1832  | Oncogenic |
| PT-073 | CALR   | NM_004343.3    | c.1154_1155insTTGTC                    | p.Lys385Asnfs*47  | Frameshift | 45.2 | 1650  | Oncogenic |

|        |        |                |                         |                  |                             |       |      |           |
|--------|--------|----------------|-------------------------|------------------|-----------------------------|-------|------|-----------|
| PT-075 | CALR   | NM_004343.3    | c.1099_1150del          | p.Leu367Thrfs*46 | Frameshift                  | 56.4  | 2525 | Oncogenic |
| PT-083 | CALR   | NM_004343.3    | c.1154_1155insTTGTC     | p.Lys385Asnfs*47 | Frameshift                  | 86.6  | 1313 | Oncogenic |
| PT-098 | CALR   | NM_004343.3    | c.1154_1155insTTGTC     | p.Lys385Asnfs*47 | Frameshift                  | 37.21 | 605  | Oncogenic |
| PT-108 | CALR   | NM_004343.3    | c.1153_1154delinsCTTGTC | p.Lys385Thrfs*47 | Frameshift                  | 36.0  | 1283 | Oncogenic |
| PT-179 | CALR   | NM_004343.3    | c.1099_1150del          | p.Leu367Thrfs*46 | Frameshift                  | 56.6  | 1702 | Oncogenic |
| PT-184 | CALR   | NM_004343.3    | c.1099_1150del          | p.Leu367Thrfs*46 | Frameshift                  | 54.3  | 1014 | Oncogenic |
| PT-188 | CALR   | NM_004343.3    | c.1154_1155insTTGTC     | p.Lys385Asnfs*47 | Frameshift                  | 33.2  | 539  | Oncogenic |
| PT-203 | CALR   | NM_004343.3    | c.1154_1155insTTGTC     | p.Lys385Asnfs*47 | Frameshift                  | 87.2  | 1420 | Oncogenic |
| PT-205 | CALR   | NM_004343.3    | c.1099_1150del          | p.Leu367Thrfs*46 | Frameshift                  | 33.8  | 411  | Oncogenic |
| PT-018 | CBL    | NM_005188.3    | c.1380_1382dupTGA       | p.Asp460dup      | In-frame Insertion          | 43.2  | 3603 | VUS       |
| PT-060 | CBL    | NM_005188.3    | c.1193A>C               | p.His398Pro      | Missense                    | 40.4  | 6964 | Oncogenic |
| PT-076 | CBL    | NM_005188.3    | c.1136A>G               | p.Gln379Arg      | Missense                    | 52.1  | 5467 | Oncogenic |
| PT-170 | CBL    | NM_005188.3    | c.1202G>A               | p.Cys401Tyr      | Missense                    | 50.5  | 4517 | Oncogenic |
| PT-182 | CBL    | NM_005188.3    | c.1151G>T               | p.Cys384Phe      | Missense                    | 32.8  | 635  | Oncogenic |
| PT-191 | CBLB   | NM_170662.3    | c.1399G>A               | p.Val467Ile      | Missense                    | 50.4  | 3909 | VUS       |
| PT-093 | CDKN2A | NM_000077.4    | c.170C>T                | p.Ala57Val       | Missense                    | 49.0  | 1082 | VUS       |
| PT-002 | CEBPA  | NM_004364.3    | c.175G>T                | p.Glu59*         | Nonsense                    | 45.0  | 229  | Oncogenic |
| PT-043 | CEBPA  | NM_004364.3    | c.896G>T                | p.Ser299Ile      | Missense                    | 26.5  | 4709 | Oncogenic |
| PT-063 | CEBPA  | NM_004364.3    | c.168C>A                | p.Cys56*         | Nonsense                    | 47.0  | 249  | Oncogenic |
| PT-097 | CEBPA  | NM_004364.3    | c.896G>T                | p.Ser299Ile      | Missense                    | 27.0  | 6066 | Oncogenic |
| PT-051 | CSF3R  | NM_156039.3    | c.2503G>A               | p.Glu835Lys      | Missense                    | 52.1  | 4641 | VUS       |
| PT-057 | CSF3R  | NM_156039.3    | c.2302C>T               | p.Gln768*        | Nonsense                    | 53.1  | 260  | Oncogenic |
| PT-057 | CSF3R  | NM_156039.3    | c.1853C>T               | p.Thr618Ile      | Missense                    | 36.4  | 1820 | Oncogenic |
| PT-065 | CSF3R  | NM_156039.3    | c.1853C>T               | p.Thr618Ile      | Missense                    | 43.0  | 2115 | Oncogenic |
| PT-068 | CSF3R  | NM_156039.3    | c.2467C>A               | p.Pro823Thr      | Missense                    | 47.3  | 2506 | VUS       |
| PT-178 | CSF3R  | NM_156039.3    | c.2092C>T               | p.Arg698Cys      | Missense                    | 47.5  | 826  | VUS       |
| PT-198 | CSF3R  | NM_156039.3    | c.2323G>A               | p.Asp775Asn      | Missense                    | 50.0  | 222  | VUS       |
| PT-205 | CSF3R  | NM_156039.3    | c.2087T>C               | p.Met696Thr      | Missense                    | 45.0  | 621  | VUS       |
| PT-008 | CUX1   | NM_001202543.1 | c.726G>T                | p.Met242Ile      | Missense                    | 51.8  | 5623 | VUS       |
| PT-025 | CUX1   | NM_001202543.1 | c.1438A>G               | p.Ser480Gly      | Missense                    | 52.4  | 312  | VUS       |
| PT-034 | CUX1   | NM_181552.3    | c.3368_3369delinsGT     | p.Ser1123Cys     | In-frame Deletion/Insertion | 50.0  | 4163 | VUS       |
| PT-060 | CUX1   | NM_181552.3    | c.2489C>T               | p.Pro830Leu      | Missense                    | 50.1  | 3703 | VUS       |
| PT-068 | CUX1   | NM_181552.3    | c.167T>G                | p.Leu56Arg       | Missense                    | 12.3  | 3777 | VUS       |

|        |        |                |                  |                     |                    |       |      |           |
|--------|--------|----------------|------------------|---------------------|--------------------|-------|------|-----------|
| PT-098 | CUX1   | NM_001202543.1 | c.1336C>A        | p.Pro446Thr         | Missense           | 84.97 | 588  | VUS       |
| PT-178 | CUX1   | NM_181552.3    | c.923_924delGA   | p.Arg308Thrfs*20    | Frameshift         | 19.5  | 1087 | Oncogenic |
| PT-183 | CUX1   | NM_001913.4    | c.1721A>C        | p.Gln574Pro         | Missense           | 54.5  | 78   | VUS       |
| PT-198 | CUX1   | NM_001202543.1 | c.3814C>T        | p.Arg1272*          | Nonsense           | 12.7  | 403  | Oncogenic |
| PT-198 | CUX1   | NM_001202543.1 | c.3047G>A        | p.Trp1016*          | Nonsense           | 15.1  | 232  | Oncogenic |
| PT-003 | DNMT3A | NM_022552.4    | c.2311C>T        | p.Arg771*           | Frameshift         | 48.8  | 1603 | Oncogenic |
| PT-010 | DNMT3A | NM_022552.4    | c.1508C>A        | p.Thr503Asn         | Missense           | 45.6  | 3200 | VUS       |
| PT-013 | DNMT3A | NM_022552.4    | c.1123-1G>A      | p.?                 | Splice site        | 38.8  | 1530 | Oncogenic |
| PT-017 | DNMT3A | NM_022552.4    | c.1547delA       | p.Asn516Thrfs*135   | Frameshift         | 38.2  | 4110 | Oncogenic |
| PT-018 | DNMT3A | NM_022552.4    | c.2606G>A        | p.Gly869Asp         | Missense           | 43.2  | 3553 | Oncogenic |
| PT-024 | DNMT3A | NM_022552.4    | c.2119G>A        | p.Gly707Ser         | Missense           | 55.4  | 2672 | Oncogenic |
| PT-043 | DNMT3A | NM_022552.4    | c.2408+1G>A      | p.?                 | Splice site        | 86.8  | 3760 | Oncogenic |
| PT-044 | DNMT3A | NM_022552.4    | c.2645G>A        | p.Arg882His         | Missense           | 63.8  | 3354 | Oncogenic |
| PT-054 | DNMT3A | NM_022552.4    | c.1628G>C        | p.Gly543Ala         | Missense           | 48.6  | 3519 | VUS       |
| PT-061 | DNMT3A | NM_022552.4    | c.2130_2131dupCA | p.Asn711Thrfs*69    | Frameshift         | 42.4  | 3083 | Oncogenic |
| PT-070 | DNMT3A | NM_022552.4    | c.2578T>C        | p.Trp860Arg         | Missense           | 44.7  | 8679 | Oncogenic |
| PT-071 | DNMT3A | NM_022552.4    | c.2645G>A        | p.Arg882His         | Missense           | 14.6  | 2508 | Oncogenic |
| PT-073 | DNMT3A | NM_022552.4    | c.2644C>T        | p.Arg882Cys         | Missense           | 47.6  | 2898 | Oncogenic |
| PT-082 | DNMT3A | NM_022552.4    | c.2645G>A        | p.Arg882His         | Missense           | 35.0  | 2894 | Oncogenic |
| PT-094 | DNMT3A | NM_022552.4    | c.2408+1G>T      | p.?                 | Splice site        | 43.8  | 3331 | Oncogenic |
| PT-095 | DNMT3A | NM_022552.4    | c.2644C>T        | p.Arg882Cys         | Missense           | 49.2  | 966  | Oncogenic |
| PT-103 | DNMT3A | NM_022552.4    | c.2635A>G        | p.Asn879Asp         | Missense           | 47.3  | 1172 | Oncogenic |
| PT-171 | DNMT3A | NM_022552.4    | c.2645G>A        | p.Arg882His         | Missense           | 61.0  | 2305 | Oncogenic |
| PT-172 | DNMT3A | NM_022552.4    | c.2248C>T        | p.Pro750Ser         | Missense           | 44.0  | 2963 | Oncogenic |
| PT-183 | DNMT3A | NM_022552.4    | c.2644C>T        | p.Arg882Cys         | Missense           | 15.5  | 385  | Oncogenic |
| PT-188 | DNMT3A | NM_022552.4    | c.2644C>T        | p.Arg882Cys         | Missense           | 43.9  | 1286 | Oncogenic |
| PT-203 | DNMT3A | NM_022552.4    | c.2645G>A        | p.Arg882His         | Missense           | 48.7  | 1256 | Oncogenic |
| PT-011 | ETV6   | NM_001987.4    | c.602T>C         | p.Leu201Pro         | Missense           | 46.6  | 3870 | VUS       |
| PT-021 | ETV6   | NM_001987.4    | c.219_221dupTGA  | p.Ala73_Glu74insAsp | In-frame Insertion | 14.7  | 683  | VUS       |
| PT-055 | ETV6   | NM_001987.4    | c.1105C>T        | p.Arg369Trp         | Missense           | 9.1   | 3374 | Oncogenic |
| PT-055 | ETV6   | NM_001987.4    | c.1183T>C        | p.Ser395Pro         | Missense           | 26.2  | 1298 | Oncogenic |
| PT-069 | ETV6   | NM_001987.4    | c.602T>C         | p.Leu201Pro         | Missense           | 46.6  | 2773 | VUS       |
| PT-090 | ETV6   | NM_001987.4    | c.496G>A         | p.Val166Met         | Missense           | 47.7  | 1697 | VUS       |

|        |       |             |                                     |                             |                             |       |       |           |
|--------|-------|-------------|-------------------------------------|-----------------------------|-----------------------------|-------|-------|-----------|
| PT-108 | ETV6  | NM_001987.4 | c.416_417delCT                      | p.Ser139Tyrfs*14            | Frameshift                  | 34.2  | 4340  | Oncogenic |
| PT-198 | ETV6  | NM_001987.4 | c.1130C>T                           | p.Ala377Val                 | Missense                    | 35.5  | 2067  | Oncogenic |
| PT-001 | EZH2  | NM_004456.4 | c.1311G>A                           | p.Trp437*                   | Nonsense                    | 95.5  | 3976  | Oncogenic |
| PT-013 | EZH2  | NM_004456.4 | c.667delA                           | p.Ile223Phefs*18            | Frameshift                  | 76.7  | 5754  | Oncogenic |
| PT-032 | EZH2  | NM_004456.4 | c.1506-1G>A                         | p.?                         | Splice site                 | 10.2  | 3084  | Oncogenic |
| PT-032 | EZH2  | NM_004456.4 | c.2018A>C                           | p.Asn673Thr                 | Missense                    | 21.1  | 4124  | Oncogenic |
| PT-033 | EZH2  | NM_004456.4 | c.1690G>T                           | p.Gly564*                   | Nonsense                    | 38.7  | 3993  | Oncogenic |
| PT-033 | EZH2  | NM_004456.4 | c.999G>C                            | p.Leu333Phe                 | Missense                    | 48.4  | 2799  | VUS       |
| PT-049 | EZH2  | NM_004456.4 | c.836A>G                            | p.His279Arg                 | Missense                    | 93.2  | 7230  | VUS       |
| PT-050 | EZH2  | NM_004456.4 | c.928delA                           | p.Thr310Leufs*11            | Frameshift                  | 41.6  | 1869  | Oncogenic |
| PT-096 | EZH2  | NM_004456.4 | c.449T>A                            | p.Ile150Lys                 | Missense                    | 35.7  | 2208  | VUS       |
| PT-098 | EZH2  | NM_004456.4 | c.2050C>T                           | p.Arg684Cys                 | Missense                    | 60.44 | 3088  | Oncogenic |
| PT-108 | EZH2  | NM_004456.4 | c.1638T>G                           | p.Asn546Lys                 | Missense                    | 67.7  | 4796  | Oncogenic |
| PT-178 | EZH2  | NM_004456.4 | c.836A>G                            | p.His279Arg                 | Missense                    | 44.0  | 3886  | VUS       |
| PT-182 | EZH2  | NM_004456.4 | c.1580C>A                           | p.Pro527His                 | Missense                    | 43.9  | 2660  | Oncogenic |
| PT-182 | EZH2  | NM_004456.4 | c.1654T>C                           | p.Cys552Arg                 | Missense                    | 44.2  | 2535  | Oncogenic |
| PT-188 | EZH2  | NM_004456.4 | c.2110+1G>A                         | p.?                         | Splice site                 | 20.5  | 991   | Oncogenic |
| PT-027 | FLT3  | NM_004119.2 | c.2525A>G                           | p.Tyr842Cys                 | Missense                    | 47.1  | 8998  | Oncogenic |
| PT-041 | FLT3  | NM_004119.2 | c.1727T>C                           | p.Leu576Pro                 | Missense                    | 7.3   | 5941  | Oncogenic |
| PT-041 | FLT3  | NM_004119.2 | c.2522A>C                           | p.Asn841Thr                 | Missense                    | 9.9   | 8116  | Oncogenic |
| PT-041 | FLT3  | NM_004119.2 | c.1800_1801insGGATGGGGAGAGCCTCCTTCT | p.Asp600_Leu601ins7         | In-frame Insertion          | 9.7   | 7330  | Oncogenic |
| PT-076 | FLT3  | NM_004119.2 | c.2503G>C                           | p.Asp835His                 | Missense                    | 35.4  | 9637  | Oncogenic |
| PT-095 | FLT3  | NM_004119.2 | c.2504_2509delinstTTC               | p.Asp835_Met837delinsValLeu | In-frame Deletion/Insertion | 13.1  | 872   | VUS       |
| PT-100 | FLT3  | NM_004119.2 | c.1758_1793dup                      | p.Asp586_Tyr597dup          | In-frame Insertion          | 17.0  | 10389 | Oncogenic |
| PT-001 | GATA2 | NM_032638.4 | c.194_200delACGCGCG                 | p.His65Argfs*13             | Frameshift                  | 33.1  | 2815  | Oncogenic |
| PT-011 | GATA2 | NM_032638.4 | c.121C>G                            | p.Pro41Ala                  | Missense                    | 53.2  | 750   | VUS       |
| PT-055 | GATA2 | NM_032638.4 | c.1168A>G                           | p.Lys390Glu                 | Missense                    | 50.4  | 1303  | Oncogenic |
| PT-068 | GATA2 | NM_032638.4 | c.992C>G                            | p.Pro331Arg                 | Missense                    | 8.2   | 4298  | Oncogenic |
| PT-068 | GATA2 | NM_032638.4 | c.302dupG                           | p.Lys102Glnfs*83            | Frameshift                  | 13.8  | 1294  | Oncogenic |
| PT-068 | GATA2 | NM_032638.4 | c.1168A>G                           | p.Lys390Glu                 | Missense                    | 59.6  | 1350  | Oncogenic |
| PT-094 | GATA2 | NM_032638.4 | c.1307dupA                          | p.His436Glnfs*100           | Frameshift                  | 37.7  | 1056  | Oncogenic |
| PT-199 | GATA2 | NM_032638.4 | c.1075T>G                           | p.Leu359Val                 | Missense                    | 47.3  | 223   | Oncogenic |
| PT-207 | GATA2 | NM_032638.4 | c.278C>A                            | p.Pro93Gln                  | Missense                    | 22.0  | 279   | VUS       |

|        |      |             |          |             |          |       |      |           |
|--------|------|-------------|----------|-------------|----------|-------|------|-----------|
| PT-001 | IDH1 | NM_005896.3 | c.394C>T | p.Arg132Cys | Missense | 38.9  | 5004 | Oncogenic |
| PT-005 | IDH1 | NM_005896.3 | c.394C>T | p.Arg132Cys | Missense | 48.4  | 4007 | Oncogenic |
| PT-017 | IDH1 | NM_005896.3 | c.394C>T | p.Arg132Cys | Missense | 35.2  | 5530 | Oncogenic |
| PT-024 | IDH1 | NM_005896.3 | c.394C>T | p.Arg132Cys | Missense | 49.5  | 6364 | Oncogenic |
| PT-026 | IDH1 | NM_005896.3 | c.395G>A | p.Arg132His | Missense | 3.2   | 5339 | Oncogenic |
| PT-033 | IDH1 | NM_005896.3 | c.394C>T | p.Arg132Cys | Missense | 2.0   | 4288 | Oncogenic |
| PT-050 | IDH1 | NM_005896.3 | c.394C>A | p.Arg132Ser | Missense | 2.4   | 3187 | Oncogenic |
| PT-056 | IDH1 | NM_005896.3 | c.334A>G | p.Ile112Val | Missense | 49.9  | 3974 | VUS       |
| PT-057 | IDH1 | NM_005896.3 | c.394C>T | p.Arg132Cys | Missense | 32.6  | 4010 | Oncogenic |
| PT-069 | IDH1 | NM_005896.3 | c.394C>T | p.Arg132Cys | Missense | 31.3  | 4088 | Oncogenic |
| PT-070 | IDH1 | NM_005896.3 | c.395G>A | p.Arg132His | Missense | 45.9  | 5032 | Oncogenic |
| PT-071 | IDH1 | NM_005896.3 | c.394C>T | p.Arg132Cys | Missense | 13.6  | 3981 | Oncogenic |
| PT-081 | IDH1 | NM_005896.3 | c.394C>T | p.Arg132Cys | Missense | 41.7  | 5101 | Oncogenic |
| PT-082 | IDH1 | NM_005896.3 | c.395G>A | p.Arg132His | Missense | 2.1   | 4522 | Oncogenic |
| PT-090 | IDH1 | NM_005896.3 | c.395G>A | p.Arg132His | Missense | 40.9  | 3186 | Oncogenic |
| PT-182 | IDH1 | NM_005896.3 | c.394C>T | p.Arg132Cys | Missense | 24.0  | 974  | Oncogenic |
| PT-193 | IDH1 | NM_005896.3 | c.394C>T | p.Arg132Cys | Missense | 5.9   | 211  | Oncogenic |
| PT-002 | IDH2 | NM_002168.3 | c.419G>A | p.Arg140Gln | Missense | 50.2  | 5032 | Oncogenic |
| PT-006 | IDH2 | NM_002168.2 | c.508A>G | p.Ile170Val | Missense | 15.02 | 617  | VUS       |
| PT-006 | IDH2 | NM_002168.2 | c.514A>T | p.Arg172Trp | Missense | 15.04 | 604  | Oncogenic |
| PT-007 | IDH2 | NM_002168.3 | c.419G>A | p.Arg140Gln | Missense | 50.1  | 5033 | Oncogenic |
| PT-021 | IDH2 | NM_002168.3 | c.515G>A | p.Arg172Lys | Missense | 29.5  | 1348 | Oncogenic |
| PT-033 | IDH2 | NM_002168.3 | c.515G>A | p.Arg172Lys | Missense | 35.9  | 4057 | Oncogenic |
| PT-038 | IDH2 | NM_002168.3 | c.419G>A | p.Arg140Gln | Missense | 42.8  | 6083 | Oncogenic |
| PT-043 | IDH2 | NM_002168.3 | c.419G>A | p.Arg140Gln | Missense | 44.6  | 4213 | Oncogenic |
| PT-046 | IDH2 | NM_002168.3 | c.419G>A | p.Arg140Gln | Missense | 47.8  | 4740 | Oncogenic |
| PT-047 | IDH2 | NM_002168.3 | c.419G>A | p.Arg140Gln | Missense | 47.4  | 5346 | Oncogenic |
| PT-051 | IDH2 | NM_002168.3 | c.419G>A | p.Arg140Gln | Missense | 48.6  | 4949 | Oncogenic |
| PT-054 | IDH2 | NM_002168.3 | c.419G>A | p.Arg140Gln | Missense | 45.9  | 4718 | Oncogenic |
| PT-082 | IDH2 | NM_002168.3 | c.419G>A | p.Arg140Gln | Missense | 28.7  | 4341 | Oncogenic |
| PT-091 | IDH2 | NM_002168.3 | c.515G>A | p.Arg172Lys | Missense | 31.7  | 1218 | Oncogenic |
| PT-101 | IDH2 | NM_002168.2 | c.419G>A | p.Arg140Gln | Missense | 50.05 | 1388 | Oncogenic |
| PT-103 | IDH2 | NM_002168.3 | c.515G>A | p.Arg172Lys | Missense | 45.9  | 2101 | Oncogenic |



|        |       |             |           |                  |            |       |       |           |
|--------|-------|-------------|-----------|------------------|------------|-------|-------|-----------|
| PT-207 | IDH2  | NM_002168.3 | c.419G>A  | p.Arg140Gln      | Missense   | 25.6  | 1296  | Oncogenic |
| PT-003 | IKZF1 | NM_006060.5 | c.787G>A  | p.Val263Met      | Missense   | 51.0  | 3111  | VUS       |
| PT-034 | IKZF1 | NM_006060.5 | c.55C>G   | p.Pro19Ala       | Missense   | 51.5  | 12136 | VUS       |
| PT-170 | IKZF1 | NM_006060.5 | c.476A>G  | p.Asn159Ser      | Missense   | 44.3  | 6365  | VUS       |
| PT-171 | IKZF1 | NM_006060.5 | c.660delA | p.Glu221Serfs*36 | Frameshift | 42.2  | 700   | Oncogenic |
| PT-182 | IKZF1 | NM_006060.5 | c.476A>G  | p.Asn159Ser      | Missense   | 17.6  | 930   | VUS       |
| PT-002 | JAK2  | NM_004972.3 | c.1849G>T | p.Val617Phe      | Missense   | 54.8  | 6001  | Oncogenic |
| PT-004 | JAK2  | NM_004972.3 | c.1849G>T | p.Val617Phe      | Missense   | 76.6  | 5174  | Oncogenic |
| PT-006 | JAK2  | NM_004972.3 | c.1849G>T | p.Val617Phe      | Missense   | 5.91  | 298   | Oncogenic |
| PT-010 | JAK2  | NM_004972.3 | c.1849G>T | p.Val617Phe      | Missense   | 95.5  | 5060  | Oncogenic |
| PT-011 | JAK2  | NM_004972.3 | c.1849G>T | p.Val617Phe      | Missense   | 99.0  | 10344 | Oncogenic |
| PT-013 | JAK2  | NM_004972.3 | c.1849G>T | p.Val617Phe      | Missense   | 80.1  | 5522  | Oncogenic |
| PT-014 | JAK2  | NM_004972.3 | c.1849G>T | p.Val617Phe      | Missense   | 48.44 | 2113  | Oncogenic |
| PT-017 | JAK2  | NM_004972.3 | c.1849G>T | p.Val617Phe      | Missense   | 41.6  | 7120  | Oncogenic |
| PT-018 | JAK2  | NM_004972.3 | c.1849G>T | p.Val617Phe      | Missense   | 60.6  | 7608  | Oncogenic |
| PT-020 | JAK2  | NM_004972.3 | c.1849G>T | p.Val617Phe      | Missense   | 58.3  | 3765  | Oncogenic |
| PT-021 | JAK2  | NM_004972.3 | c.1849G>T | p.Val617Phe      | Missense   | 40.7  | 2389  | Oncogenic |
| PT-024 | JAK2  | NM_004972.3 | c.1849G>T | p.Val617Phe      | Missense   | 98.5  | 6247  | Oncogenic |
| PT-025 | JAK2  | NM_004972.3 | c.1849G>T | p.Val617Phe      | Missense   | 20.8  | 460   | Oncogenic |
| PT-030 | JAK2  | NM_004972.3 | c.1849G>T | p.Val617Phe      | Missense   | 93.1  | 5076  | Oncogenic |
| PT-031 | JAK2  | NM_004972.3 | c.1849G>T | p.Val617Phe      | Missense   | 98.3  | 5239  | Oncogenic |
| PT-038 | JAK2  | NM_004972.3 | c.1849G>T | p.Val617Phe      | Missense   | 80.9  | 5880  | Oncogenic |
| PT-042 | JAK2  | NM_004972.3 | c.1849G>T | p.Val617Phe      | Missense   | 77.1  | 4980  | Oncogenic |
| PT-043 | JAK2  | NM_004972.3 | c.1849G>T | p.Val617Phe      | Missense   | 62.6  | 4164  | Oncogenic |
| PT-044 | JAK2  | NM_004972.3 | c.1849G>T | p.Val617Phe      | Missense   | 92.8  | 4663  | Oncogenic |
| PT-045 | JAK2  | NM_004972.3 | c.1849G>T | p.Val617Phe      | Missense   | 55.4  | 4354  | Oncogenic |
| PT-046 | JAK2  | NM_004972.3 | c.1849G>T | p.Val617Phe      | Missense   | 45.7  | 6116  | Oncogenic |
| PT-047 | JAK2  | NM_004972.3 | c.1849G>T | p.Val617Phe      | Missense   | 46.4  | 7080  | Oncogenic |
| PT-048 | JAK2  | NM_004972.3 | c.1849G>T | p.Val617Phe      | Missense   | 98.4  | 6659  | Oncogenic |
| PT-050 | JAK2  | NM_004972.3 | c.1849G>T | p.Val617Phe      | Missense   | 48.1  | 5101  | Oncogenic |
| PT-054 | JAK2  | NM_004972.3 | c.1849G>T | p.Val617Phe      | Missense   | 50.4  | 5717  | Oncogenic |
| PT-056 | JAK2  | NM_004972.3 | c.1849G>T | p.Val617Phe      | Missense   | 66.5  | 5778  | Oncogenic |
| PT-058 | JAK2  | NM_004972.3 | c.1849G>T | p.Val617Phe      | Missense   | 51.5  | 6892  | Oncogenic |

|        |      |             |           |             |          |       |       |           |
|--------|------|-------------|-----------|-------------|----------|-------|-------|-----------|
| PT-059 | JAK2 | NM_004972.3 | c.1849G>T | p.Val617Phe | Missense | 61.1  | 10063 | Oncogenic |
| PT-061 | JAK2 | NM_004972.3 | c.1849G>T | p.Val617Phe | Missense | 82.8  | 9475  | Oncogenic |
| PT-063 | JAK2 | NM_004972.3 | c.1849G>T | p.Val617Phe | Missense | 50.1  | 4798  | Oncogenic |
| PT-066 | JAK2 | NM_004972.3 | c.1849G>T | p.Val617Phe | Missense | 15.4  | 5975  | Oncogenic |
| PT-069 | JAK2 | NM_004972.3 | c.1849G>T | p.Val617Phe | Missense | 56.1  | 6823  | Oncogenic |
| PT-070 | JAK2 | NM_004972.3 | c.1849G>T | p.Val617Phe | Missense | 92.9  | 6150  | Oncogenic |
| PT-074 | JAK2 | NM_004972.3 | c.1849G>T | p.Val617Phe | Missense | 88.7  | 4078  | Oncogenic |
| PT-078 | JAK2 | NM_004972.3 | c.1849G>T | p.Val617Phe | Missense | 90.7  | 7779  | Oncogenic |
| PT-080 | JAK2 | NM_004972.3 | c.1849G>T | p.Val617Phe | Missense | 3.2   | 6222  | Oncogenic |
| PT-082 | JAK2 | NM_004972.3 | c.1849G>T | p.Val617Phe | Missense | 30.1  | 4912  | Oncogenic |
| PT-084 | JAK2 | NM_004972.3 | c.1849G>T | p.Val617Phe | Missense | 64.5  | 8912  | Oncogenic |
| PT-085 | JAK2 | NM_004972.3 | c.1849G>T | p.Val617Phe | Missense | 30.9  | 5827  | Oncogenic |
| PT-086 | JAK2 | NM_004972.3 | c.1849G>T | p.Val617Phe | Missense | 46.8  | 3669  | Oncogenic |
| PT-090 | JAK2 | NM_004972.3 | c.1849G>T | p.Val617Phe | Missense | 86.0  | 2989  | Oncogenic |
| PT-094 | JAK2 | NM_004972.3 | c.1849G>T | p.Val617Phe | Missense | 47.1  | 6285  | Oncogenic |
| PT-095 | JAK2 | NM_004972.3 | c.1849G>T | p.Val617Phe | Missense | 47.8  | 2175  | Oncogenic |
| PT-097 | JAK2 | NM_004972.3 | c.1849G>T | p.Val617Phe | Missense | 57.9  | 5443  | Oncogenic |
| PT-101 | JAK2 | NM_004972.3 | c.1849G>T | p.Val617Phe | Missense | 94.13 | 3093  | Oncogenic |
| PT-102 | JAK2 | NM_004972.3 | c.1849G>T | p.Val617Phe | Missense | 90.81 | 4762  | Oncogenic |
| PT-103 | JAK2 | NM_004972.3 | c.1849G>T | p.Val617Phe | Missense | 88.1  | 5074  | Oncogenic |
| PT-105 | JAK2 | NM_004972.3 | c.1849G>T | p.Val617Phe | Missense | 24.0  | 1358  | Oncogenic |
| PT-107 | JAK2 | NM_004972.3 | c.1849G>T | p.Val617Phe | Missense | 7.7   | 5610  | Oncogenic |
| PT-111 | JAK2 | NM_004972.3 | c.1849G>T | p.Val617Phe | Missense | 81.1  | 2595  | Oncogenic |
| PT-170 | JAK2 | NM_004972.3 | c.1849G>T | p.Val617Phe | Missense | 3.0   | 4001  | Oncogenic |
| PT-171 | JAK2 | NM_004972.3 | c.1849G>T | p.Val617Phe | Missense | 90.7  | 4839  | Oncogenic |
| PT-172 | JAK2 | NM_004972.3 | c.1849G>T | p.Val617Phe | Missense | 13.5  | 769   | Oncogenic |
| PT-173 | JAK2 | NM_004972.3 | c.1849G>T | p.Val617Phe | Missense | 94.3  | 4425  | Oncogenic |
| PT-174 | JAK2 | NM_004972.3 | c.1849G>T | p.Val617Phe | Missense | 81    | 5749  | Oncogenic |
| PT-176 | JAK2 | NM_004972.3 | c.1849G>T | p.Val617Phe | Missense | 2.0   | 5535  | Oncogenic |
| PT-177 | JAK2 | NM_004972.3 | c.1849G>T | p.Val617Phe | Missense | 99.2  | 4605  | Oncogenic |
| PT-178 | JAK2 | NM_004972.3 | c.1849G>T | p.Val617Phe | Missense | 82.2  | 5714  | Oncogenic |
| PT-182 | JAK2 | NM_004972.3 | c.1849G>T | p.Val617Phe | Missense | 44.7  | 1746  | Oncogenic |
| PT-193 | JAK2 | NM_004972.3 | c.1849G>T | p.Val617Phe | Missense | 72.8  | 3213  | Oncogenic |

|        |        |             |                                |                  |            |      |      |           |
|--------|--------|-------------|--------------------------------|------------------|------------|------|------|-----------|
| PT-198 | JAK2   | NM_004972.3 | c.1849G>T                      | p.Val617Phe      | Missense   | 55.3 | 887  | Oncogenic |
| PT-199 | JAK2   | NM_004972.3 | c.1849G>T                      | p.Val617Phe      | Missense   | 49.4 | 1838 | Oncogenic |
| PT-200 | JAK2   | NM_004972.3 | c.1849G>T                      | p.Val617Phe      | Missense   | 96.3 | 5666 | Oncogenic |
| PT-202 | JAK2   | NM_004972.3 | c.1849G>T                      | p.Val617Phe      | Missense   | 14.9 | 944  | Oncogenic |
| PT-204 | JAK2   | NM_004972.3 | c.1849G>T                      | p.Val617Phe      | Missense   | 72.7 | 7196 | Oncogenic |
| PT-207 | JAK2   | NM_004972.3 | c.1849G>T                      | p.Val617Phe      | Missense   | 28.5 | 1353 | Oncogenic |
| PT-208 | JAK2   | NM_004972.3 | c.1849G>T                      | p.Val617Phe      | Missense   | 54.9 | 1631 | Oncogenic |
| PT-071 | KDM6A  | NM_021140.3 | c.1515G>C                      | p.Met505Ile      | Missense   | 51.6 | 3377 | VUS       |
| PT-026 | KIT    | NM_000222.2 | c.2447A>T                      | p.Asp816Val      | Missense   | 45.5 | 2658 | Oncogenic |
| PT-054 | KIT    | NM_000222.2 | c.200C>G                       | p.Thr67Ser       | Missense   | 48.6 | 8276 | VUS       |
| PT-011 | KRAS   | NM_033360.3 | c.99T>A                        | p.Asp33Glu       | Missense   | 13.5 | 6587 | Oncogenic |
| PT-016 | KRAS   | NM_033360.3 | c.182A>G                       | p.Gln61Arg       | Missense   | 36.8 | 471  | Oncogenic |
| PT-031 | KRAS   | NM_033360.3 | c.35G>C                        | p.Gly12Ala       | Missense   | 48.7 | 4461 | Oncogenic |
| PT-043 | KRAS   | NM_033360.3 | c.35G>T                        | p.Gly12Val       | Missense   | 2.8  | 3064 | Oncogenic |
| PT-049 | KRAS   | NM_033360.3 | c.35G>T                        | p.Gly12Val       | Missense   | 38.2 | 5162 | Oncogenic |
| PT-055 | KRAS   | NM_033360.3 | c.179G>A                       | p.Gly60Asp       | Missense   | 79.3 | 2144 | VUS       |
| PT-068 | KRAS   | NM_033360.3 | c.35G>C                        | p.Gly12Ala       | Missense   | 17.2 | 5312 | Oncogenic |
| PT-089 | KRAS   | NM_033360.3 | c.204G>T                       | p.Arg68Ser       | Missense   | 15.1 | 1893 | VUS       |
| PT-095 | KRAS   | NM_033360.3 | c.35G>A                        | p.Gly12Asp       | Missense   | 7.2  | 306  | Oncogenic |
| PT-200 | KRAS   | NM_033360.3 | c.34G>C                        | p.Gly12Arg       | Missense   | 29.4 | 1627 | Oncogenic |
| PT-007 | MPL    | NM_005373.2 | c.1544G>T                      | p.Trp515Leu      | Missense   | 97.4 | 2730 | Oncogenic |
| PT-032 | MPL    | NM_005373.2 | c.1543_1544delinsAA            | p.Trp515Lys      | Missense   | 94.2 | 4449 | Oncogenic |
| PT-049 | MPL    | NM_005373.2 | c.1544G>T                      | p.Trp515Leu      | Missense   | 91.4 | 2713 | Oncogenic |
| PT-064 | MPL    | NM_005373.2 | c.1544G>T                      | p.Trp515Leu      | Missense   | 29.8 | 5844 | Oncogenic |
| PT-081 | MPL    | NM_005373.2 | c.1544G>T                      | p.Trp515Leu      | Missense   | 47.5 | 4131 | Oncogenic |
| PT-089 | MPL    | NM_005373.2 | c.1514G>A                      | p.Ser505Asn      | Missense   | 16.6 | 2778 | Oncogenic |
| PT-191 | MPL    | NM_005373.2 | c.1543_1544delinsAA            | p.Trp515Lys      | Missense   | 82.7 | 4872 | Oncogenic |
| PT-091 | MYD88  | NM_002468.4 | c.794T>C                       | p.Leu265Pro      | Missense   | 9.7  | 251  | Oncogenic |
| PT-008 | NOTCH1 | NM_017617.3 | c.7157A>G                      | p.Gln2386Arg     | Missense   | 49.2 | 1137 | VUS       |
| PT-050 | NOTCH1 | NM_017617.3 | c.7488_7504delCACCCCAGCCACCAGC | p.Pro2498Glyfs*3 | Frameshift | 63.6 | 1007 | Oncogenic |
| PT-108 | NOTCH1 | NM_017617.3 | c.6625T>C                      | p.Tyr2209His     | Missense   | 44.4 | 2366 | VUS       |
| PT-192 | NOTCH1 | NM_017617.3 | c.6205G>A                      | p.Ala2069Thr     | Missense   | 48.9 | 1305 | VUS       |
| PT-026 | NPM1   | NM_002520.6 | c.860_863dupTCTG               | p.Trp288Cysfs*12 | Frameshift | 42.0 | 2720 | Oncogenic |

|        |        |             |                  |                  |                    |       |       |           |
|--------|--------|-------------|------------------|------------------|--------------------|-------|-------|-----------|
| PT-040 | NPM1   | NM_002520.6 | c.863_864insTTTG | p.Trp288Cysfs*12 | Frameshift         | 31.5  | 3208  | Oncogenic |
| PT-001 | NRAS   | NM_002524.3 | c.35G>A          | p.Gly12Asp       | Missense           | 48.2  | 10426 | Oncogenic |
| PT-006 | NRAS   | NM_002524.4 | c.35G>A          | p.Gly12Asp       | Missense           | 18.52 | 1605  | Oncogenic |
| PT-013 | NRAS   | NM_002524.3 | c.35G>T          | p.Gly12Val       | Missense           | 39.7  | 7776  | Oncogenic |
| PT-018 | NRAS   | NM_002524.3 | c.35G>C          | p.Gly12Ala       | Missense           | 37.0  | 9073  | Oncogenic |
| PT-020 | NRAS   | NM_002524.3 | c.208C>T         | p.Gln70*         | Nonsense           | 57.9  | 261   | VUS       |
| PT-037 | NRAS   | NM_002524.3 | c.35G>A          | p.Gly12Asp       | Missense           | 3.0   | 10216 | Oncogenic |
| PT-037 | NRAS   | NM_002524.3 | c.35G>T          | p.Gly12Val       | Missense           | 30.9  | 10216 | Oncogenic |
| PT-043 | NRAS   | NM_002524.3 | c.35G>C          | p.Gly12Ala       | Missense           | 10.7  | 9455  | Oncogenic |
| PT-051 | NRAS   | NM_002524.3 | c.190T>G         | p.Tyr64Asp       | Missense           | 46.0  | 465   | VUS       |
| PT-068 | NRAS   | NM_002524.3 | c.35G>A          | p.Gly12Asp       | Missense           | 4.1   | 7230  | Oncogenic |
| PT-080 | NRAS   | NM_002524.3 | c.35G>T          | p.Gly12Val       | Missense           | 4.0   | 10175 | Oncogenic |
| PT-093 | NRAS   | NM_002524.3 | c.34G>A          | p.Gly12Ser       | Missense           | 21.9  | 2137  | Oncogenic |
| PT-171 | NRAS   | NM_002524.3 | c.35G>A          | p.Gly12Asp       | Missense           | 43.0  | 4553  | Oncogenic |
| PT-200 | NRAS   | NM_002524.3 | c.38G>T          | p.Gly13Val       | Missense           | 4.6   | 421   | Oncogenic |
| PT-202 | NRAS   | NM_002524.3 | c.35G>A          | p.Gly12Asp       | Missense           | 14.9  | 1301  | Oncogenic |
| PT-203 | NRAS   | NM_002524.3 | c.35G>A          | p.Gly12Asp       | Missense           | 23.6  | 1885  | Oncogenic |
| PT-004 | PHF6   | NM_032458.2 | c.862_864dupGCT  | p.Ala288dup      | In-frame Insertion | 44.7  | 480   | VUS       |
| PT-020 | PHF6   | NM_032458.2 | c.821G>A         | p.Arg274Gln      | Missense           | 39.3  | 1811  | Oncogenic |
| PT-021 | PHF6   | NM_032458.2 | c.133_134dupTG   | p.Met46Alafs*36  | Frameshift         | 22.4  | 356   | Oncogenic |
| PT-053 | PHF6   | NM_032458.2 | c.941T>C         | p.Ile314Thr      | Missense           | 27.0  | 1955  | Oncogenic |
| PT-091 | PHF6   | NM_032458.2 | c.875G>T         | p.Cys292Phe      | Missense           | 23.4  | 572   | Oncogenic |
| PT-097 | PHF6   | NM_032458.2 | c.67_70delAATA   | p.Asn23Glufs*9   | Frameshift         | 68.8  | 1356  | Oncogenic |
| PT-178 | PHF6   | NM_032458.2 | c.937T>A         | p.Tyr313Asn      | Missense           | 45.2  | 1590  | Oncogenic |
| PT-193 | PHF6   | NM_032458.2 | c.418+1G>T       | p.?              | Splice site        | 66.8  | 1304  | Oncogenic |
| PT-204 | PHF6   | NM_032458.2 | c.821G>A         | p.Arg274Gln      | Missense           | 18.4  | 410   | Oncogenic |
| PT-208 | PHF6   | NM_032458.2 | c.461C>G         | p.Ser154*        | Nonsense           | 84.3  | 2063  | Oncogenic |
| PT-036 | PTPN11 | NM_002834.3 | c.215C>T         | p.Ala72Val       | Missense           | 36.5  | 9824  | Oncogenic |
| PT-054 | PTPN11 | NM_002834.3 | c.215C>T         | p.Ala72Val       | Missense           | 8.6   | 9125  | Oncogenic |
| PT-039 | RAD21  | NM_006265.2 | c.1364T>C        | p.Val455Ala      | Missense           | 36.0  | 1798  | VUS       |
| PT-065 | RAD21  | NM_006265.2 | c.166T>C         | p.Ser56Pro       | Missense           | 20.6  | 8552  | VUS       |
| PT-080 | RAD21  | NM_006265.2 | c.1242T>G        | p.Asp414Glu      | Missense           | 50.5  | 2232  | VUS       |
| PT-087 | RAD21  | NM_006265.2 | c.1576G>C        | p.Glu526Gln      | Missense           | 49.2  | 4062  | VUS       |

|        |       |             |                              |                    |             |       |      |           |
|--------|-------|-------------|------------------------------|--------------------|-------------|-------|------|-----------|
| PT-089 | RAD21 | NM_006265.2 | c.127_128dupAG               | p.Ser43Argfs*8     | Frameshift  | 35.9  | 4731 | Oncogenic |
| PT-104 | RAD21 | NM_006265.2 | c.1576G>C                    | p.Glu526Gln        | Missense    | 23.4  | 1771 | VUS       |
| PT-005 | RUNX1 | NM_001754.4 | c.1346dupA                   | p.Ser450Glnfs*150  | Frameshift  | 8.5   | 1948 | Oncogenic |
| PT-005 | RUNX1 | NM_001754.4 | c.334C>G                     | p.Leu112Val        | Missense    | 27.2  | 3574 | Oncogenic |
| PT-005 | RUNX1 | NM_001754.4 | c.280_281dupAG               | p.Ser94Argfs*29    | Frameshift  | 46.6  | 3577 | Oncogenic |
| PT-006 | RUNX1 | NM_001754.4 | c.339dupC                    | p.Ile114HisfsTer24 | Frameshift  | 18.9  | 470  | Oncogenic |
| PT-007 | RUNX1 | NM_001754.4 | c.292dupC                    | p.Leu98Profs*40    | Frameshift  | 82.4  | 1440 | Oncogenic |
| PT-020 | RUNX1 | NM_001754.4 | c.1426_1436delGTGTGGAGGCC    | p.Val476Leufs*120  | Frameshift  | 10.0  | 619  | Oncogenic |
| PT-021 | RUNX1 | NM_001754.4 | c.749_752dupGTGC             | p.Ser252Cysfs*10   | Frameshift  | 16.5  | 245  | Oncogenic |
| PT-023 | RUNX1 | NM_001754.4 | c.330G>T                     | p.Lys110Asn        | Missense    | 12.3  | 4933 | Oncogenic |
| PT-024 | RUNX1 | NM_001754.4 | c.329_335delAGACCCT          | p.Lys110Serfs*10   | Frameshift  | 50.8  | 4434 | Oncogenic |
| PT-038 | RUNX1 | NM_001754.4 | c.958C>T                     | p.Arg320*          | Nonsense    | 5.2   | 6355 | Oncogenic |
| PT-047 | RUNX1 | NM_001754.4 | c.602G>A                     | p.Arg201Gln        | Missense    | 45.5  | 6811 | Oncogenic |
| PT-047 | RUNX1 | NM_001754.4 | c.593A>G                     | p.Asp198Gly        | Missense    | 45.6  | 6724 | Oncogenic |
| PT-057 | RUNX1 | NM_001754.4 | c.1090_1103delATCGGCATCGGCAT | p.Ile364Valfs*231  | Frameshift  | 30.0  | 4787 | Oncogenic |
| PT-059 | RUNX1 | NM_001754.4 | c.611G>A                     | p.Arg204Gln        | Missense    | 91.1  | 9618 | Oncogenic |
| PT-069 | RUNX1 | NM_001754.4 | c.778_779dupAA               | p.Asn260Lysfs*52   | Frameshift  | 39.4  | 1237 | Oncogenic |
| PT-070 | RUNX1 | NM_001754.4 | c.805+1delG                  | p.?                | Splice site | 61.1  | 2218 | Oncogenic |
| PT-083 | RUNX1 | NM_001754.4 | c.497G>A                     | p.Arg166Gln        | Missense    | 43.8  | 9671 | Oncogenic |
| PT-091 | RUNX1 | NM_001754.4 | c.539dupT                    | p.Thr181Hisfs*32   | Frameshift  | 30.1  | 1523 | Oncogenic |
| PT-095 | RUNX1 | NM_001754.4 | c.499A>G                     | p.Ser167Gly        | Missense    | 47.8  | 2606 | Oncogenic |
| PT-098 | RUNX1 | NM_001754.4 | c.593A>C                     | p.Asp198Ala        | Missense    | 35.84 | 2351 | Oncogenic |
| PT-103 | RUNX1 | NM_001754.4 | c.1407_1414dupCGCGCGCC       | p.Leu472Profs*125  | Frameshift  | 18.5  | 197  | Oncogenic |
| PT-104 | RUNX1 | NM_001754.4 | c.1005G>T                    | p.Gln335His        | Missense    | 50.7  | 3124 | Oncogenic |
| PT-171 | RUNX1 | NM_001754.4 | c.592G>T                     | p.Asp198Tyr        | Missense    | 42.7  | 1752 | Oncogenic |
| PT-171 | RUNX1 | NM_001754.4 | c.422C>A                     | p.Ser141*          | Nonsense    | 36.5  | 2555 | Oncogenic |
| PT-177 | RUNX1 | NM_001754.4 | c.1007_1013dupTCCCCGC        | p.Leu339Profs*263  | Frameshift  | 43.8  | 5991 | Oncogenic |
| PT-182 | RUNX1 | NM_001754.4 | c.958C>T                     | p.Arg320*          | Nonsense    | 19.8  | 864  | Oncogenic |
| PT-193 | RUNX1 | NM_001754.4 | c.610C>T                     | p.Arg204*          | Nonsense    | 13.2  | 658  | Oncogenic |
| PT-193 | RUNX1 | NM_001754.4 | c.593A>G                     | p.Asp198Gly        | Missense    | 22.1  | 1093 | Oncogenic |
| PT-198 | RUNX1 | NM_001754.4 | c.511A>T                     | p.Lys171*          | Nonsense    | 34.0  | 2738 | Oncogenic |
| PT-204 | RUNX1 | NM_001754.4 | c.748_749insA                | p.Arg250Glnfs*11   | Frameshift  | 17.0  | 251  | Oncogenic |
| PT-204 | RUNX1 | NM_001754.4 | c.508+2T>A                   | p.?                | Splice site | 22.5  | 1990 | Oncogenic |

|        |        |                |                 |             |                    |       |       |           |
|--------|--------|----------------|-----------------|-------------|--------------------|-------|-------|-----------|
| PT-001 | SETBP1 | NM_015559.2    | c.2602G>A       | p.Asp868Asn | Missense           | 4.1   | 5801  | Oncogenic |
| PT-037 | SETBP1 | NM_015559.2    | c.2608G>A       | p.Gly870Ser | Missense           | 46.1  | 4050  | Oncogenic |
| PT-060 | SETBP1 | NM_015559.2    | c.2612T>C       | p.Ile871Thr | Missense           | 22.2  | 5707  | Oncogenic |
| PT-062 | SETBP1 | NM_015559.2    | c.2608G>A       | p.Gly870Ser | Missense           | 83.6  | 5998  | Oncogenic |
| PT-065 | SETBP1 | NM_015559.2    | c.2608G>A       | p.Gly870Ser | Missense           | 49.2  | 4440  | Oncogenic |
| PT-089 | SETBP1 | NM_015559.2    | c.2602G>A       | p.Asp868Asn | Missense           | 6.9   | 3859  | Oncogenic |
| PT-089 | SETBP1 | NM_015559.2    | c.2602G>T       | p.Asp868Tyr | Missense           | 12.9  | 3859  | Oncogenic |
| PT-093 | SETBP1 | NM_015559.2    | c.2609G>A       | p.Gly870Asp | Missense           | 47.2  | 2610  | Oncogenic |
| PT-100 | SETBP1 | NM_015559.2    | c.2605A>G       | p.Ser869Gly | Missense           | 49.1  | 7133  | Oncogenic |
| PT-107 | SETBP1 | NM_015559.2    | c.2608G>A       | p.Gly870Ser | Missense           | 5.4   | 4040  | Oncogenic |
| PT-183 | SETBP1 | NM_015559.2    | c.2608G>A       | p.Gly870Ser | Missense           | 3.0   | 88    | Oncogenic |
| PT-188 | SETBP1 | NM_015559.2    | c.2602G>A       | p.Asp868Asn | Missense           | 24.1  | 927   | Oncogenic |
| PT-026 | SF3B1  | NM_012433.2    | c.1998G>C       | p.Lys666Asn | Missense           | 49.4  | 4984  | Oncogenic |
| PT-071 | SF3B1  | NM_012433.2    | c.1873C>T       | p.Arg625Cys | Missense           | 13.5  | 4102  | Oncogenic |
| PT-074 | SF3B1  | NM_012433.2    | c.1998G>T       | p.Lys666Asn | Missense           | 49.1  | 2129  | Oncogenic |
| PT-076 | SF3B1  | NM_012433.2    | c.1998G>C       | p.Lys666Asn | Missense           | 43.4  | 4487  | Oncogenic |
| PT-081 | SF3B1  | NM_012433.2    | c.1998G>T       | p.Lys666Asn | Missense           | 43.7  | 4850  | Oncogenic |
| PT-094 | SF3B1  | NM_012433.2    | c.2098A>G       | p.Lys700Glu | Missense           | 47.5  | 11294 | Oncogenic |
| PT-102 | SF3B1  | NM_012433.2    | c.1998G>C       | p.Lys666Asn | Missense           | 49.14 | 1867  | Oncogenic |
| PT-170 | SF3B1  | NM_012433.2    | c.1998G>T       | p.Lys666Asn | Missense           | 55.1  | 3776  | Oncogenic |
| PT-202 | SF3B1  | NM_012433.3    | c.1865A>T       | p.Glu622Val | Missense           | 44.5  | 2125  | Oncogenic |
| PT-207 | SMC1A  | NM_006306.3    | c.1756C>T       | p.Arg586Trp | Missense           | 48.0  | 1029  | Oncogenic |
| PT-062 | SMC3   | NM_005445.3    | c.804+2T>G      | p.?         | Splice site        | 41.5  | 3189  | Oncogenic |
| PT-002 | SRSF2  | NM_001195427.1 | c.284C>A        | p.Pro95His  | Missense           | 53.6  | 1301  | Oncogenic |
| PT-005 | SRSF2  | NM_001195427.1 | c.284C>A        | p.Pro95His  | Missense           | 50.1  | 1557  | Oncogenic |
| PT-006 | SRSF2  | NM_001195427.1 | c.281_283dupGCC | p.Arg94dup  | In-frame Insertion | 21.34 | 226   | Oncogenic |
| PT-006 | SRSF2  | NM_001195427.1 | c.284C>A        | p.Pro95His  | Missense           | 39.19 | 415   | Oncogenic |
| PT-007 | SRSF2  | NM_001195427.1 | c.284C>T        | p.Pro95Leu  | Missense           | 50.7  | 1002  | Oncogenic |
| PT-011 | SRSF2  | NM_001195427.1 | c.284C>G        | p.Pro95Arg  | Missense           | 43.0  | 535   | Oncogenic |
| PT-014 | SRSF2  | NM_001195427.1 | c.283C>A        | p.Pro95Thr  | Missense           | 48.03 | 439   | Oncogenic |
| PT-021 | SRSF2  | NM_001195427.1 | c.284C>A        | p.Pro95His  | Missense           | 44.0  | 691   | Oncogenic |
| PT-037 | SRSF2  | NM_001195427.1 | c.284C>A        | p.Pro95His  | Missense           | 44.1  | 1892  | Oncogenic |
| PT-038 | SRSF2  | NM_001195427.1 | c.284C>G        | p.Pro95Arg  | Missense           | 41.0  | 2496  | Oncogenic |

|        |       |                |                                      |                               |                             |       |       |           |
|--------|-------|----------------|--------------------------------------|-------------------------------|-----------------------------|-------|-------|-----------|
| PT-041 | SRSF2 | NM_001195427.1 | c.170T>A                             | p.Phe57Tyr                    | Missense                    | 49.2  | 3815  | VUS       |
| PT-044 | SRSF2 | NM_001195427.1 | c.284C>A                             | p.Pro95His                    | Missense                    | 48.3  | 1384  | Oncogenic |
| PT-046 | SRSF2 | NM_001195427.1 | c.284C>G                             | p.Pro95Arg                    | Missense                    | 45.2  | 2081  | Oncogenic |
| PT-047 | SRSF2 | NM_001195427.1 | c.284C>T                             | p.Pro95Leu                    | Missense                    | 44.7  | 1819  | Oncogenic |
| PT-051 | SRSF2 | NM_001195427.1 | c.284C>A                             | p.Pro95His                    | Missense                    | 51.3  | 1863  | Oncogenic |
| PT-055 | SRSF2 | NM_001195427.1 | c.284C>A                             | p.Pro95His                    | Missense                    | 49.5  | 1399  | Oncogenic |
| PT-058 | SRSF2 | NM_001195427.1 | c.284_307delCCCCGGACTCACACCACAGCCGCC | p.Pro95_Arg102del             | In-frame Insertion          | 35.0  | 2174  | Oncogenic |
| PT-059 | SRSF2 | NM_001195427.1 | c.284_307delCCCCGGACTCACACCACAGCCGCC | p.Pro95_Arg102del             | In-frame Insertion          | 50.2  | 2131  | Oncogenic |
| PT-060 | SRSF2 | NM_001195427.1 | c.284C>A                             | p.Pro95His                    | Missense                    | 23.0  | 2089  | Oncogenic |
| PT-062 | SRSF2 | NM_001195427.1 | c.284C>T                             | p.Pro95Leu                    | Missense                    | 43.4  | 2035  | Oncogenic |
| PT-064 | SRSF2 | NM_001195427.1 | c.281_284delinsCCCA,                 | p.Arg94_Pro95delinsProHis     | In-frame Deletion/Insertion | 39.0  | 2687  | Oncogenic |
| PT-064 | SRSF2 | NM_001195427.1 | c.188A>T                             | p.His63Leu                    | Missense                    | 39.4  | 2617  | VUS       |
| PT-065 | SRSF2 | NM_001195427.1 | c.284C>A                             | p.Pro95His                    | Missense                    | 48.4  | 2068  | Oncogenic |
| PT-068 | SRSF2 | NM_001195427.1 | c.284_307delCCCCGGACTCACACCACAGCCGCC | p.Pro95_Arg102del             | In-frame Deletion           | 51.2  | 1198  | Oncogenic |
| PT-081 | SRSF2 | NM_001195427.1 | c.284C>A                             | p.Pro95His                    | Missense                    | 47.8  | 1734  | Oncogenic |
| PT-093 | SRSF2 | NM_001195427.1 | c.284C>A                             | p.Pro95His                    | Missense                    | 49.6  | 737   | Oncogenic |
| PT-101 | SRSF2 | NM_001195427.1 | c.284C>T                             | p.Pro95Leu                    | Missense                    | 46.67 | 407   | Oncogenic |
| PT-107 | SRSF2 | NM_001195427.1 | c.284C>A                             | p.Pro95His                    | Missense                    | 5.9   | 1607  | Oncogenic |
| PT-183 | SRSF2 | NM_001195427.1 | c.284C>A                             | p.Pro95His                    | Missense                    | 6.4   | 96    | Oncogenic |
| PT-207 | SRSF2 | NM_001195427.1 | c.284C>A                             | p.Pro95His                    | Missense                    | 22.6  | 353   | Oncogenic |
| PT-002 | STAG2 | NM_001042749.2 | c.1840C>T                            | p.Arg614*                     | Nonsense                    | 7.3   | 1391  | Oncogenic |
| PT-004 | STAG2 | NM_001042749.2 | c.1535-3_1535-2insA                  | p.?                           | Splice site                 | 40.7  | 706   | Oncogenic |
| PT-006 | STAG2 | NM_001042749.1 | c.2438T>A                            | p.Leu813*                     | Nonsense                    | 12.73 | 1143  | Oncogenic |
| PT-021 | STAG2 | NM_001042749.2 | c.541G>A                             | p.Val181Met                   | Missense                    | 99.0  | 4320  | VUS       |
| PT-029 | STAG2 | NM_001042749.2 | c.940A>G                             | p.Ile314Val                   | Missense                    | 45.9  | 5236  | VUS       |
| PT-037 | STAG2 | NM_001042749.2 | c.2096+2T>A                          | p.?                           | Splice site                 | 85.7  | 1086  | Oncogenic |
| PT-043 | STAG2 | NM_001042749.2 | c.913C>T                             | p.Arg305*                     | Nonsense                    | 43.3  | 5834  | Oncogenic |
| PT-045 | STAG2 | NM_001042749.2 | c.1391T>A                            | p.Leu464*                     | Nonsense                    | 33.2  | 12291 | Oncogenic |
| PT-050 | STAG2 | NM_001042749.2 | c.1068T>A                            | p.Tyr356*                     | Nonsense                    | 50.9  | 1485  | Oncogenic |
| PT-051 | STAG2 | NM_001042749.2 | c.775C>T                             | p.Arg259*                     | Nonsense                    | 95.4  | 689   | Oncogenic |
| PT-063 | STAG2 | NM_001042749.2 | c.3372_3376delinsACATG               | p.Ile1125_Met1126delinsHisVal | In-frame Deletion/Insertion | 75.5  | 4012  | VUS       |
| PT-065 | STAG2 | NM_001042749.2 | c.3383_3384delAG                     | p.Glu1128Alafs*7              | Frameshift                  | 5.7   | 4686  | Oncogenic |
| PT-080 | STAG2 | NM_001042749.2 | c.2462_2469delinsAGAACTGA            | p.Leu821*                     | Nonsense                    | 6.8   | 5684  | Oncogenic |

|        |       |                |                            |                   |             |       |       |           |
|--------|-------|----------------|----------------------------|-------------------|-------------|-------|-------|-----------|
| PT-080 | STAG2 | NM_001042749.2 | c.774_775insGGACCGAAACCTTC | p.Arg259Glyfs*11  | Frameshift  | 17.2  | 995   | Oncogenic |
| PT-091 | STAG2 | NM_001042749.2 | c.1840C>T                  | p.Arg614*         | Nonsense    | 29.4  | 856   | Oncogenic |
| PT-105 | STAG2 | NM_001042749.2 | c.484dupA                  | p.Thr162Asnfs*16  | Frameshift  | 30.7  | 998   | Oncogenic |
| PT-170 | STAG2 | NM_001042749.2 | c.1731+1_1731+2insT        | p.?               | Splice site | 86.4  | 1358  | Oncogenic |
| PT-176 | STAG2 | NM_001042749.2 | c.2984T>A                  | p.Leu995*         | Nonsense    | 7.5   | 1173  | Oncogenic |
| PT-003 | TET2  | NM_001127208.2 | c.3100_3104delCAGTT        | p.Gln1034Serfs*7  | Frameshift  | 44.9  | 9968  | Oncogenic |
| PT-003 | TET2  | NM_001127208.2 | c.3116C>T                  | p.Ser1039Leu      | Missense    | 51.0  | 11397 | VUS       |
| PT-003 | TET2  | NM_001127208.2 | c.3426delA                 | p.Asp1143Metfs*9  | Frameshift  | 47.5  | 3619  | Oncogenic |
| PT-006 | TET2  | NM_001127208.2 | c.1648C>T                  | p.Arg550*         | Nonsense    | 84.88 | 2116  | Oncogenic |
| PT-011 | TET2  | NM_001127208.2 | c.3965T>A                  | p.Leu1322Gln      | Missense    | 49.9  | 12647 | Oncogenic |
| PT-014 | TET2  | NM_001127208.2 | c.5650A>G                  | p.Thr1884Ala      | Missense    | 68.96 | 3774  | Oncogenic |
| PT-020 | TET2  | NM_001127208.2 | c.3604A>G                  | p.Arg1202Gly      | Missense    | 31.9  | 2355  | Oncogenic |
| PT-026 | TET2  | NM_001127208.2 | c.1700T>A                  | p.Leu567*         | Nonsense    | 59.1  | 3669  | Oncogenic |
| PT-026 | TET2  | NM_001127208.2 | c.3251A>C                  | p.Gln1084Pro      | Missense    | 61.1  | 5918  | VUS       |
| PT-027 | TET2  | NM_001127208.2 | c.1337delT                 | p.Leu446*         | Nonsense    | 46.2  | 6043  | Oncogenic |
| PT-027 | TET2  | NM_001127208.2 | c.3579T>G                  | p.Cys1193Trp      | Missense    | 46.3  | 9522  | Oncogenic |
| PT-034 | TET2  | NM_001127208.2 | c.2452_2453insTA           | p.Pro818Leufs*7   | Frameshift  | 48.0  | 12084 | Oncogenic |
| PT-034 | TET2  | NM_001127208.2 | c.4642C>T                  | p.Gln1548*        | Nonsense    | 48.3  | 3553  | Oncogenic |
| PT-036 | TET2  | NM_001127208.2 | c.3398G>C                  | p.Cys1133Ser      | Missense    | 90.4  | 3274  | Oncogenic |
| PT-040 | TET2  | NM_001127208.2 | c.2656C>T                  | p.Gln886*         | Nonsense    | 34.6  | 5944  | Oncogenic |
| PT-040 | TET2  | NM_001127208.2 | c.3409+1_3409+2insT        | p.?               | Splice site | 35.1  | 3820  | Oncogenic |
| PT-044 | TET2  | NM_001127208.2 | c.4386_4387delGA           | p.Lys1462Asnfs*15 | Frameshift  | 38.2  | 4232  | Oncogenic |
| PT-044 | TET2  | NM_001127208.2 | c.4388C>T                  | p.Thr1463Ile      | Missense    | 49.3  | 4599  | Oncogenic |
| PT-045 | TET2  | NM_001127208.2 | c.3443_3453delATACCCATCTA  | p.Tyr1148Trpfs*5  | Frameshift  | 48.7  | 4409  | Oncogenic |
| PT-045 | TET2  | NM_001127208.2 | c.4062_4063delAG           | p.Arg1354Serfs*46 | Frameshift  | 46.6  | 1607  | Oncogenic |
| PT-050 | TET2  | NM_001127208.2 | c.5449C>A                  | p.His1817Asn      | Missense    | 52.1  | 5968  | VUS       |
| PT-053 | TET2  | NM_001127208.2 | c.3885delC                 | p.Tyr1295*        | Nonsense    | 91.7  | 4115  | Oncogenic |
| PT-055 | TET2  | NM_001127208.2 | c.3967G>T                  | p.Glu1323*        | Nonsense    | 98.5  | 8961  | Oncogenic |
| PT-061 | TET2  | NM_001127208.2 | c.3578G>A                  | p.Cys1193Tyr      | Missense    | 47.2  | 8013  | Oncogenic |
| PT-061 | TET2  | NM_001127208.2 | c.4317dupA                 | p.Arg1440Thrfs*38 | Frameshift  | 39.0  | 4702  | Oncogenic |
| PT-063 | TET2  | NM_001127208.2 | c.2233C>T                  | p.Gln745*         | Nonsense    | 46.9  | 9789  | Oncogenic |
| PT-063 | TET2  | NM_001127208.2 | c.3662G>C                  | p.Cys1221Ser      | Missense    | 45.9  | 3996  | Oncogenic |
| PT-064 | TET2  | NM_001127208.2 | c.4241A>G                  | p.Gln1414Arg      | Missense    | 84.7  | 6177  | Oncogenic |



|        |      |                |                                  |                      |                   |       |       |           |
|--------|------|----------------|----------------------------------|----------------------|-------------------|-------|-------|-----------|
| PT-066 | TET2 | NM_001127208.2 | c.3008G>A                        | p.Trp1003*           | Nonsense          | 14.5  | 8279  | Oncogenic |
| PT-071 | TET2 | NM_001127208.2 | c.4627_4644delAGACCCCAGCAGCAGCAG | p.Arg1543_Gln1548del | In-frame Deletion | 38.1  | 2683  | VUS       |
| PT-078 | TET2 | NM_001127208.2 | c.4149_4154delAGACTT             | p.Asp1384_Leu1385del | In-frame Deletion | 81.2  | 1851  | Oncogenic |
| PT-080 | TET2 | NM_001127208.2 | c.2771A>G                        | p.His924Arg          | Missense          | 52.4  | 6421  | VUS       |
| PT-082 | TET2 | NM_001127208.2 | c.5103G>A                        | p.Met1701Ile         | Missense          | 48.8  | 6571  | VUS       |
| PT-083 | TET2 | NM_001127208.2 | c.5103G>A                        | p.Met1701Ile         | Missense          | 50.0  | 7609  | VUS       |
| PT-093 | TET2 | NM_001127208.2 | c.5482C>T                        | p.Gln1828*           | Nonsense          | 48.0  | 960   | Oncogenic |
| PT-094 | TET2 | NM_001127208.2 | c.2737C>T                        | p.Gln913*            | Nonsense          | 49.1  | 5903  | Oncogenic |
| PT-094 | TET2 | NM_001127208.2 | c.3854_3856delTCT                | p.Phe1285del         | In-frame Deletion | 44.3  | 6481  | Oncogenic |
| PT-095 | TET2 | NM_001127208.2 | c.4546C>T                        | p.Arg1516*           | Nonsense          | 48.3  | 1086  | Oncogenic |
| PT-097 | TET2 | NM_001127208.2 | c.1852C>T                        | p.Gln618*            | Nonsense          | 85.4  | 10666 | Oncogenic |
| PT-097 | TET2 | NM_001127208.2 | c.2786delC                       | p.Pro929Leufs*24     | Frameshift        | 10.6  | 5979  | Oncogenic |
| PT-102 | TET2 | NM_001127208.2 | c.4500delA                       | p.Lys1500Asnfs*71    | Frameshift        | 48.03 | 2554  | Oncogenic |
| PT-102 | TET2 | NM_001127208.2 | c.3781C>T                        | p.Arg1261Cys         | Missense          | 49.64 | 1590  | Oncogenic |
| PT-173 | TET2 | NM_001127208.2 | c.4661_4664delCAGA               | p.Thr1554Serfs*16    | Frameshift        | 96.8  | 1530  | Oncogenic |
| PT-177 | TET2 | NM_001127208.2 | c.2839C>T                        | p.Gln947*            | Nonsense          | 49.5  | 5989  | Oncogenic |
| PT-178 | TET2 | NM_001127208.2 | c.474_475insC                    | p.Ala159Argfs*3      | Frameshift        | 50.2  | 7786  | Oncogenic |
| PT-178 | TET2 | NM_001127208.2 | c.5618T>C                        | p.Ile1873Thr         | Missense          | 44.2  | 772   | Oncogenic |
| PT-183 | TET2 | NM_001127208.2 | c.4210C>T                        | p.Arg1404*           | Nonsense          | 7.5   | 216   | Oncogenic |
| PT-199 | TET2 | NM_001127208.2 | c.2599T>C                        | p.Tyr867His          | Missense          | 46.7  | 2730  | VUS       |
| PT-199 | TET2 | NM_001127208.2 | c.5167C>T                        | p.Pro1723Ser         | Missense          | 48.8  | 5833  | VUS       |
| PT-203 | TET2 | NM_001127208.2 | c.5618T>C                        | p.Ile1873Thr         | Missense          | 48.7  | 907   | Oncogenic |
| PT-208 | TET2 | NM_001127208.2 | c.4097G>A                        | p.Arg1366His         | Missense          | 93.5  | 1780  | Oncogenic |
| PT-014 | TP53 | NM_000546.5    | c.824G>A                         | p.Cys275Tyr          | Missense          | 77.84 | 1247  | Oncogenic |
| PT-016 | TP53 | NM_000546.5    | c.524G>A                         | p.Arg175His          | Missense          | 96.7  | 1493  | Oncogenic |
| PT-017 | TP53 | NM_000546.5    | c.578A>C                         | p.His193Pro          | Missense          | 62.0  | 1634  | Oncogenic |
| PT-028 | TP53 | NM_000546.5    | c.742C>T                         | p.Arg248Trp          | Missense          | 20.9  | 9511  | Oncogenic |
| PT-039 | TP53 | NM_000546.5    | c.743G>A                         | p.Arg248Gln          | Missense          | 75.0  | 4683  | Oncogenic |
| PT-052 | TP53 | NM_000546.5    | c.827C>A                         | p.Ala276Asp          | Missense          | 96.2  | 4385  | Oncogenic |
| PT-061 | TP53 | NM_000546.5    | c.892delG                        | p.Glu298Serfs*47     | Frameshift        | 25.1  | 3258  | Oncogenic |
| PT-066 | TP53 | NM_000546.5    | c.859G>T                         | p.Glu287*            | Nonsense          | 48.5  | 3875  | Oncogenic |
| PT-073 | TP53 | NM_000546.5    | c.659A>G                         | p.Tyr220Cys          | Missense          | 82.4  | 1203  | Oncogenic |
| PT-078 | TP53 | NM_000546.5    | c.742C>T                         | p.Arg248Trp          | Missense          | 77.6  | 5484  | Oncogenic |

|        |       |                |                      |                  |             |      |       |           |
|--------|-------|----------------|----------------------|------------------|-------------|------|-------|-----------|
| PT-084 | TP53  | NM_000546.5    | c.267delC            | p.Ser90Profs*33  | Frameshift  | 73.1 | 1279  | Oncogenic |
| PT-086 | TP53  | NM_000546.5    | c.711G>A             | p.Met237Ile      | Missense    | 88.7 | 7299  | Oncogenic |
| PT-087 | TP53  | NM_000546.5    | c.718A>G             | p.Ser240Gly      | Missense    | 25.0 | 8978  | Oncogenic |
| PT-087 | TP53  | NM_000546.5    | c.737T>C             | p.Met246Thr      | Missense    | 27.6 | 8957  | Oncogenic |
| PT-096 | TP53  | NM_000546.5    | c.707A>G             | p.Tyr236Cys      | Missense    | 61.4 | 3684  | Oncogenic |
| PT-104 | TP53  | NM_000546.5    | c.646G>A             | p.Val216Met      | Missense    | 79.3 | 906   | Oncogenic |
| PT-171 | TP53  | NM_000546.5    | c.524G>A             | p.Arg175His      | Missense    | 4.3  | 132   | Oncogenic |
| PT-176 | TP53  | NM_000546.5    | c.818G>A             | p.Arg273His      | Missense    | 56.3 | 3688  | Oncogenic |
| PT-178 | TP53  | NM_000546.5    | c.713G>A             | p.Cys238Tyr      | Missense    | 29.0 | 5110  | Oncogenic |
| PT-184 | TP53  | NM_000546.5    | c.524G>A             | p.Arg175His      | Missense    | 2.7  | 45    | Oncogenic |
| PT-187 | TP53  | NM_000546.5    | c.659A>G             | p.Tyr220Cys      | Missense    | 86.8 | 2257  | Oncogenic |
| PT-205 | TP53  | NM_000546.5    | c.476C>T             | p.Ala159Val      | Missense    | 17.5 | 505   | Oncogenic |
| PT-018 | U2AF1 | NM_001025203.1 | c.101C>T             | p.Ser34Phe       | Missense    | 40.3 | 8309  | Oncogenic |
| PT-020 | U2AF1 | NM_001025203.1 | c.470A>C             | p.Gln157Pro      | Missense    | 35.4 | 1719  | Oncogenic |
| PT-027 | U2AF1 | NM_001025203.1 | c.101C>T             | p.Ser34Phe       | Missense    | 51.9 | 7999  | Oncogenic |
| PT-034 | U2AF1 | NM_001025203.1 | c.101C>T             | p.Ser34Phe       | Missense    | 48.5 | 10558 | Oncogenic |
| PT-050 | U2AF1 | NM_001025203.1 | c.470A>G             | p.Gln157Arg      | Missense    | 48.1 | 2320  | Oncogenic |
| PT-057 | U2AF1 | NM_001025203.1 | c.470A>C             | p.Gln157Pro      | Missense    | 36.8 | 1793  | Oncogenic |
| PT-083 | U2AF1 | NM_001025203.1 | c.101C>A             | p.Ser34Tyr       | Missense    | 42.5 | 9773  | Oncogenic |
| PT-086 | U2AF1 | NM_001025203.1 | c.470A>G             | p.Gln157Arg      | Missense    | 46.8 | 1884  | Oncogenic |
| PT-089 | U2AF1 | NM_001025203.1 | c.470A>C             | p.Gln157Pro      | Missense    | 34.9 | 1649  | Oncogenic |
| PT-095 | U2AF1 | NM_001025203.1 | c.101C>A             | p.Ser34Tyr       | Missense    | 47.4 | 3202  | Oncogenic |
| PT-200 | U2AF1 | NM_001025203.1 | c.101C>T             | p.Ser34Phe       | Missense    | 46.0 | 3740  | Oncogenic |
| PT-074 | WT1   | NM_024426.3    | c.1108_1109insT      | p.Arg370Leufs*15 | Frameshift  | 10.7 | 3493  | Oncogenic |
| PT-013 | ZRSR2 | NM_005089.3    | c.55_57delinsTGAAGAA | p.Arg19*         | Nonsense    | 28.0 | 375   | Oncogenic |
| PT-030 | ZRSR2 | NM_005089.3    | c.827+2T>G           | p.?              | Splice site | 68.2 | 4774  | Oncogenic |
| PT-030 | ZRSR2 | NM_005089.3    | c.857T>C             | p.Leu286Pro      | Missense    | 18.3 | 1057  | VUS       |
| PT-064 | ZRSR2 | NM_005089.3    | c.298C>T             | p.Gln100*        | Nonsense    | 29.2 | 1447  | Oncogenic |
| PT-065 | ZRSR2 | NM_005089.3    | c.653_656dupACTA     | p.Tyr219*        | Nonsense    | 44.2 | 4652  | Oncogenic |
| PT-107 | ZRSR2 | NM_005089.3    | c.988C>T             | p.His330Tyr      | Missense    | 8.9  | 3775  | VUS       |
| PT-202 | ZRSR2 | NM_005089.3    | c.892_896delCAGTG    | p.Gln298*        | Nonsense    | 62.9 | 581   | Oncogenic |

**Supplementary Table 3:** Baseline characteristics of all patients with post MPN-AML comparing patients with and without an available tissue sample

|                                                                 | <b>NGS = Yes<br/>(n = 122)</b> | <b>NGS = No<br/>(n = 58)</b> | <b>P value</b> |
|-----------------------------------------------------------------|--------------------------------|------------------------------|----------------|
| Proportion male, n (%)                                          | 72 (59)                        | 39 (67)                      | 0.29           |
| MPN diagnosis at AP/BP, n (%)                                   |                                |                              | 0.23           |
| PV/ PPV-MF                                                      | 40 (33)                        | 12 (21)                      |                |
| ET/ PET-MF                                                      | 38 (31)                        | 18 (31)                      |                |
| PMF                                                             | 34 (28)                        | 24 (41)                      |                |
| MPN-U                                                           | 10 (8)                         | 4 (7)                        |                |
| Age at AP/BP, yrs, median (range)                               | 69 (36-86)                     | 66 (36-89)                   | 0.18           |
| Time from MPN diagnosis to AP/BP, yrs, median (range)           | 5.4 (0.0-43.0)                 | 5.2 (0.1-40.1)               | 0.60           |
| Prior MPN therapies, n (%)                                      |                                |                              | 0.94           |
| 0 or 1                                                          | 73 (60)                        | 35 (60)                      |                |
| 2                                                               | 25 (21)                        | 11 (19)                      |                |
| ≥3                                                              | 24 (20)                        | 11 (19)                      |                |
| Status at time of NGS, n (%)                                    |                                |                              | 0.19           |
| Accelerated phase                                               | 14 (11)                        | 12 (21)                      |                |
| AML*                                                            | 107 (88)                       | 44 (76)                      |                |
| Other                                                           | 1 (1)                          | 2 (3)                        |                |
| ECOG at AP/BP, n (%)                                            |                                |                              | 0.83           |
| 0 or 1                                                          | 88 (72)                        | 39 (67)                      |                |
| 2                                                               | 17 (14)                        | 9 (16)                       |                |
| ≥ 3                                                             | 14 (12)                        | 8 (14)                       |                |
| Not available                                                   | 3 (3)                          | 2 (3)                        |                |
| Hemoglobin, g/L median (range) (n = 120)                        | 88 (51-183)                    | 88 (58-144)                  | 0.73           |
| White Blood Cells, x10 <sup>9</sup> /L median (range) (n = 121) | 12.8 (0.8-278.0)               | 16.7 (0.9-173.0)             | 0.83           |
| Platelets, x10 <sup>9</sup> /L median (range) (n = 120)         | 62 (7-1918)                    | 65.5 (1-620)                 | 0.73           |
| Blasts in PB, % median (range) (n = 121)                        | 24 (0-96)                      | 18.5 (0-97)                  | 0.04           |
| Blasts in BM, % median (range) (n = 100)                        | 35 (0-95)                      | 18.5 (7-95)                  | 0.51           |
| LDH, U/L median (range)                                         | 624 (144-4274)                 | 740 (129-5893)               | 0.74           |
| Albumin, g/L median (range)                                     | 37 (23-48)                     | 36 (25-46)                   | 0.44           |
| Spleen status, n (%)                                            |                                |                              | 0.27           |
| Splenectomy                                                     | 8 (7)                          | 4 (7)                        |                |
| Not palpable                                                    | 40 (33)                        | 13 (22)                      |                |
| Spleen ≤10cm BCM                                                | 30 (25)                        | 12 (21)                      |                |
| Spleen >11cm BCM                                                | 37 (30)                        | 22 (38)                      |                |
| Missing                                                         | 7 (6)                          | 7 (12)                       |                |
| Cytogenetic status, n (%)                                       |                                |                              | 0.19           |
| Cytogenetics available                                          | 94 (77)                        | 41 (71)                      |                |
| Failed                                                          | 11 (9)                         | 3 (5)                        |                |
| Not done                                                        | 17 (14)                        | 14 (24)                      |                |
| Cytogenetic abnormalities, n (%)                                |                                |                              | 0.76           |
| Normal                                                          | 30 (25)                        | 10 (24)                      |                |
| 1 abnormality                                                   | 18 (15)                        | 9 (22)                       |                |
| 2 abnormalities                                                 | 14 (12)                        | 5 (12)                       |                |
| 3 or more abnormalities                                         | 32 (26)                        | 17 (41)                      |                |
| Monosomal Karyotype                                             |                                |                              | 0.67           |
| Yes                                                             | 22 (23)                        | 12 (21)                      |                |
| Karyotype as per revised MRC, n (%)                             |                                |                              | 0.93           |
| Favorable                                                       | 2 (2)                          | 1 (2)                        |                |
| Intermediate                                                    | 58 (62)                        | 24 (59)                      |                |
| Adverse                                                         | 34 (36)                        | 16 (39)                      |                |
| Treatment received, n (%)                                       |                                |                              | 0.82           |
| Induction                                                       | 43 (35)                        | 23 (40)                      |                |

|                                               |                 |                |      |
|-----------------------------------------------|-----------------|----------------|------|
| 3+7                                           | 20 (16)         | 12 (21)        |      |
| FLAG-IDA                                      | 13 (11)         | 3 (5)          |      |
| NOVE-HIDAC                                    | 10 (8)          | 7 (12)         |      |
| Other APL protocol                            | 0(0)            | 1 (2)          |      |
| Transplant upfront                            | 1 (1)           | 0 (0)          |      |
| HMA                                           | 16 (13)         | 7 ( )          |      |
| Clinical trial                                | 10 (8)          | 2 (4)          |      |
| Low dose chemotherapy                         | 1 (1)           | 1 (2)          |      |
| Best supportive care                          | 51 (42)         | 24 (42)        |      |
| Missing                                       | 0 (0)           | 1 (2)          |      |
| Allogeneic transplant, n (%)                  |                 |                |      |
| Yes                                           | 19 (16)         | 9 (16)         | 0.99 |
| No                                            | 103 (84)        | 49 (84)        |      |
| Overall survival, months median (range)       | 5.8 (0.0-167.8) | 3.6 (0.0-72.6) | 0.14 |
| 2yr survival from AP/BP <sup>#</sup> , % (SE) | 15 (4)          | 13 (5)         | 0.17 |

\*AML includes myeloid sarcoma; Other includes MPAL and APL; <sup>#</sup>comparison of the whole curve, not simply at 2 years

Abbreviations: NGS, next generation sequencing; MPN, myeloproliferative neoplasm; AP, accelerated phase; BP, blast phase; PV, polycythemia vera; PPV-MF, post PV myelofibrosis; ET, essential thrombocythemia; PET-MF, post ET myelofibrosis; PMF, primary myelofibrosis; MPN-U, myeloproliferative neoplasm-unclassifiable; AML, acute myeloid leukemia; ECOG, Eastern Cooperative Oncology Group; PB, peripheral blood; BM, bone marrow; LDH, lactate dehydrogenase; BCM, below costal margin; MRC, Medical Research Council (United Kingdom); HMA, hypomethylating agent; SE, standard error; MPAL, mixed phenotype acute leukemia; APL, acute promyelocytic leukemia.

**Supplementary Table 4:** Baseline characteristics and outcomes stratified by treatment approach

|                                                       | <b>Intensive Therapy<br/>n = 44</b> | <b>Non-Intensive<br/>Therapy<br/>n = 27</b> | <b>Best Supportive<br/>Care<br/>n = 51</b> | <b>P Value</b>    |
|-------------------------------------------------------|-------------------------------------|---------------------------------------------|--------------------------------------------|-------------------|
| Proportion male, n (%)                                | 27 (61)                             | 19 (70)                                     | 26 (51)                                    | 0.23              |
| MPN diagnosis at AP/BP, n (%)                         |                                     |                                             |                                            | 0.62              |
| PV/ PPV-MF                                            | 15 (34)                             | 7 (26)                                      | 18 (35)                                    |                   |
| ET/ PET-MF                                            | 11 (25)                             | 11 (41)                                     | 16 (31)                                    |                   |
| PMF                                                   | 12 (27)                             | 7 (26)                                      | 15 (29)                                    |                   |
| MPN-U                                                 | 6 (14)                              | 2 (7)                                       | 2 (4)                                      |                   |
| Age at AP/BP, yrs, median (range)                     | 57.7 (36.3-76.1)                    | 73.9 (58.8-83.1)                            | 73.5 (49.5-86.4)                           | <b>&lt;0.0001</b> |
| Time from MPN diagnosis to AP/BP, yrs, median (range) | 3.2 (0.2-29.3)                      | 6.5 (0.6-26.6)                              | 6.6 (0.0-43.0)                             | 0.45              |
| Prior MPN therapies, n (%)                            |                                     |                                             |                                            | 0.78              |
| 0 or 1                                                | 26 (59)                             | 18 (67)                                     | 29 (57)                                    |                   |
| 2                                                     | 8 (18)                              | 6 (22)                                      | 11 (22)                                    |                   |
| ≥3                                                    | 10 (23)                             | 3 (11)                                      | 11 (22)                                    |                   |
| Status at time of NGS, n (%)                          |                                     |                                             |                                            | 0.06              |
| Accelerated phase                                     | 1 (2)                               | 5 (19)                                      | 8 (16)                                     |                   |
| AML*                                                  | 43 (98)                             | 22(81)                                      | 42 (82)                                    |                   |
| MPAL                                                  | 0 (0)                               | 0 (0)                                       | 1 (2)                                      |                   |
| ECOG at AP/BP, n (%)                                  |                                     |                                             |                                            | <b>&lt;0.0001</b> |
| 0 or 1                                                | 41 (93)                             | 22 (82)                                     | 25 (49)                                    |                   |
| 2                                                     | 2 (5)                               | 4 (15)                                      | 11 (22)                                    |                   |
| ≥ 3                                                   | 0 (0)                               | 1 (4)                                       | 13 (26)                                    |                   |
| Missing                                               | 1 (2)                               | 0 (0)                                       | 2 (4)                                      |                   |
| Hemoglobin, g/L median (range)                        | 92 (55-177)                         | 86 (51-112)                                 | 88 (68-183)                                | 0.21              |
| White Blood Cells, x10 <sup>9</sup> /L median (range) | 16.1 (1.3-213)                      | 10.1 (0.9-138.8)                            | 11.7 (0.8-278.0)                           | 0.61              |
| Platelets, x10 <sup>9</sup> /L median (range)         | 78 (8-865)                          | 100 (14-1918)                               | 47 (7-863)                                 | 0.08              |
| Blasts in PB, % median (range)                        | 25 (0-90)                           | 17 (0-83)                                   | 27 (0-96)                                  | 0.33              |
| Blasts in BM, % median (range)                        | 35 (0-90)                           | 28 (1-90)                                   | 42 (0-95)                                  | 0.53              |
| LDH, U/L median (range)                               | 726 (144-3944)                      | 530 (156-4000)                              | 624 (168-4274)                             | 0.46              |
| Albumin, g/L median (range)                           | 37 (27-47)                          | 37 (31-48)                                  | 36 (23-47)                                 | <b>0.04</b>       |
| Spleen status, n (%)                                  |                                     |                                             |                                            | 0.41              |
| Splenectomy                                           | 5 (11)                              | 0 (0)                                       | 3 (6)                                      |                   |
| Not palpable                                          | 13 (30)                             | 9 (33)                                      | 18 (35)                                    |                   |
| Spleen ≤10 cm BCM                                     | 8 (18)                              | 7 (26)                                      | 15 (29)                                    |                   |
| Spleen >11 cm BCM                                     | 14 (32)                             | 11 (41)                                     | 12 (24)                                    |                   |
| Missing                                               | 4 (9)                               | 0 (0)                                       | 3 (6)                                      |                   |
| Cytogenetic abnormalities, n (%)                      |                                     |                                             |                                            | 0.17              |
| Normal                                                | 16 (42)                             | 7 (35)                                      | 7 (19)                                     |                   |
| 1 abnormality                                         | 5 (13)                              | 6 (30)                                      | 7 (19)                                     |                   |
| 2 abnormalities                                       | 5 (13)                              | 4 (20)                                      | 5 (14)                                     |                   |
| 3 or more abnormalities                               | 12 (32)                             | 3 (15)                                      | 17 (47)                                    |                   |
| Not available <sup>#</sup>                            | 6 (14)                              | 7 (26)                                      | 15 (29)                                    |                   |
| AML stratified by driver mutation, n (%)              |                                     |                                             |                                            | 0.40              |
| JAK2 mutated AML                                      | 21 (48)                             | 13 (48)                                     | 33 (65)                                    |                   |
| CALR mutated AML                                      | 8 (18)                              | 5 (19)                                      | 3 (6)                                      |                   |
| MPL mutated AML                                       | 2 (5)                               | 2 (7)                                       | 3 (6)                                      |                   |
| Triple negative AML                                   | 13 (30)                             | 7 (26)                                      | 12 (24)                                    |                   |

|                                         |                 |                 |              |                   |
|-----------------------------------------|-----------------|-----------------|--------------|-------------------|
| Overall survival, months median (range) | 9.7 (0.1-167.8) | 10.8 (1.3-45.4) | 1.9 (0-45.5) | <b>&lt;0.0001</b> |
| 2 yr survival from AP/BP, % (SE)        | 18 (6)          | 15 (9)          | 9 (4)        | <b>&lt;0.0001</b> |

\*AML includes myeloid sarcoma; #Includes failed and not done

Abbreviations: MPN, myeloproliferative neoplasm; AP, accelerated phase; BP, blast phase; PV, polycythemia vera; PPV-MF, post PV myelofibrosis; ET, essential thrombocythemia; PET-MF, post ET myelofibrosis; PMF, primary myelofibrosis; MPN-U, myeloproliferative neoplasm-unclassifiable; NGS, next generation sequencing; AML, acute myeloid leukemia; MPAL, mixed phenotype acute leukemia, ECOG, Eastern Cooperative Oncology Group; PB, peripheral blood; BM, bone marrow; LDH, lactate dehydrogenase; BCM, below costal margin; MRC, Medical Research Council (United Kingdom); SE, standard error.

**Supplementary Table 5:** Table showing overall survival for patients with mutations in none, one or both RAS and JAK-STAT signaling pathways\*

|                                                                               | <b>Median OS<br/>(Months)</b> | <b>HR(95%CI)</b>              | <b>Global<br/>p-value</b> |
|-------------------------------------------------------------------------------|-------------------------------|-------------------------------|---------------------------|
| JAK-STAT Pathway Mutations <sup>a</sup><br>Yes (n=92)<br>No (n=30)            | 5.7<br>6.9                    | Reference<br>0.90 (0.58,1.41) | 0.65                      |
| RAS Pathway Mutations <sup>b</sup><br>Yes (n=28)<br>No (n=94)                 | 2.5<br>8.6                    | Reference<br>0.58 (0.37,0.92) | <b>0.02</b>               |
| JAK-STAT Mutations AND<br>RAS Mutations Yes (n=17)<br>RAS Mutations No (n=75) | 1.7<br>8.0                    | Reference<br>0.46 (0.27,0.81) | <b>0.01</b>               |
| NO JAK-STAT Mutations<br>RAS Mutations Yes (n=11)<br>RAS Mutations No (n=19)  | 6.5<br>8.6                    | Reference<br>0.78 (0.35,1.75) | 0.55                      |

<sup>a</sup>Mutations in *JAK2*, *CALR*, *MPL*, *CSF3R*

<sup>b</sup>Mutations in *NRAS*, *KRAS*, *PTPN11*, *CBL*, *FLT3*, *KIT*

\*Mutations in *MYD88* (Toll-like receptor signaling pathway) and *NOTCH1* (Notch signaling pathway) were only seen in 1 patient each, and consequently these classes were not included in this analysis.
